# Supplementary material for: Verifying the relationships among the variabilities of summer precipitation extremes over western Japan in the d4PDF climate ensemble, monsoon activity, and Pacific sea surface temperature
Source: Copernicus journal article supplement (doi:10.5194/egusphere-2024-1304), 2024-06-04
Supplement: Supplementary file 1 [file egusphere-2024-1304-supplement.pdf]

## Supplementary Material Section 1

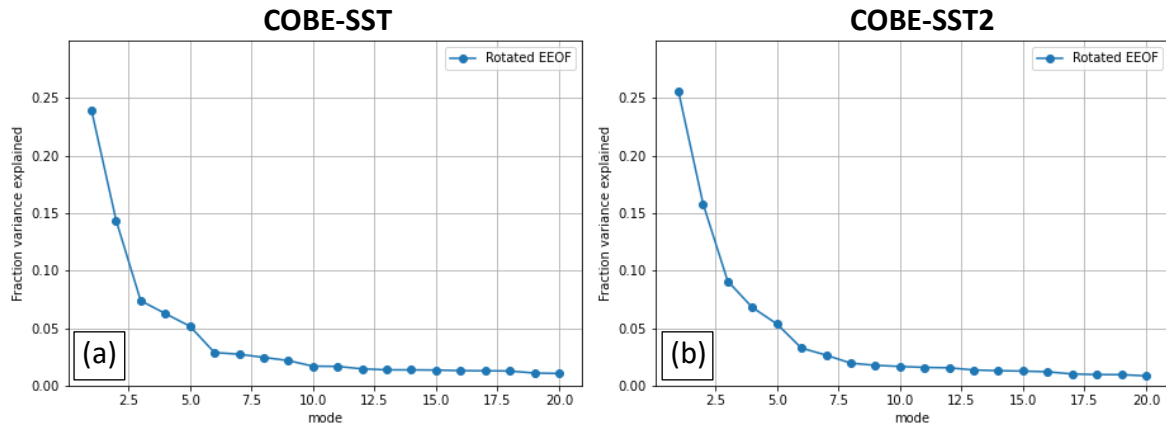

**Supplementary Figure S2-0.** Comparison of the fractional explained variance by the rotated modes of (a) COBE-SST and (b) COBE-SST2, for the period of 1952–2022.

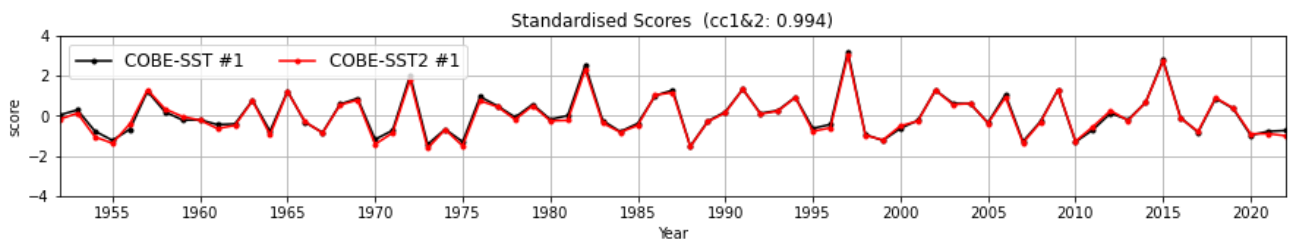

**Supplementary Figure S2-1a.** Comparison of standardised scores from the 1st rotated PCA mode of (black line) COBE-SST and (red line) COBE-SST2, for the period of 1952–2022.

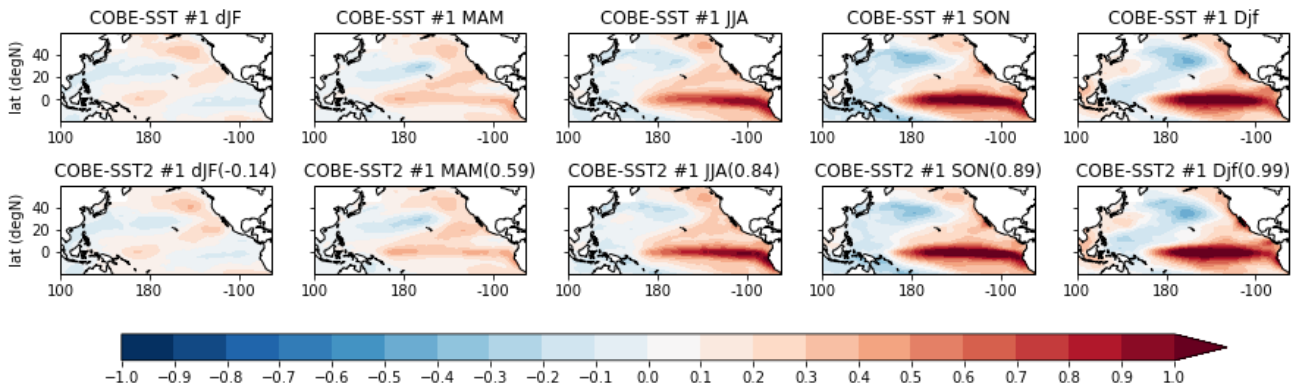

**Supplementary Figure S2-1b.** Comparison of loadings from the 1st rotated PCA mode of (top row) COBE-SST and (bottom row) COBE-SST2, for the period of 1952–2022.

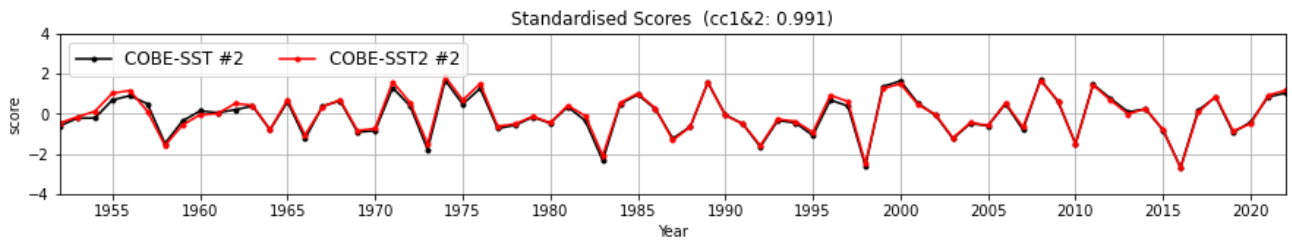

**Supplementary Figure S2-2a.** Comparison of standardised scores from the **2nd** rotated PCA mode of (black line) COBE-SST and (red line) COBE-SST2, for the period of 1952–2022.

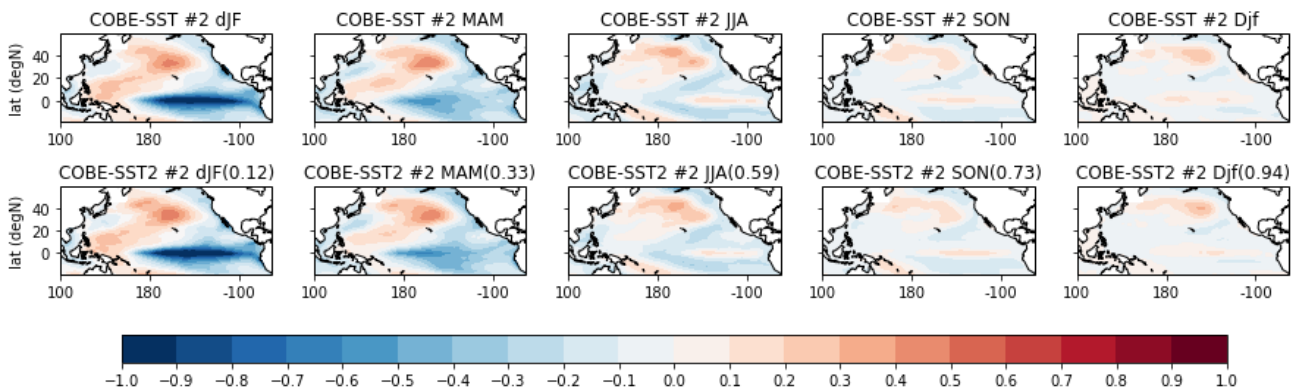

**Supplementary Figure S2-2b.** Comparison of loadings from the **2nd** rotated PCA mode of (top row) COBE-SST and (bottom row) COBE-SST2, for the period of 1952–2022.

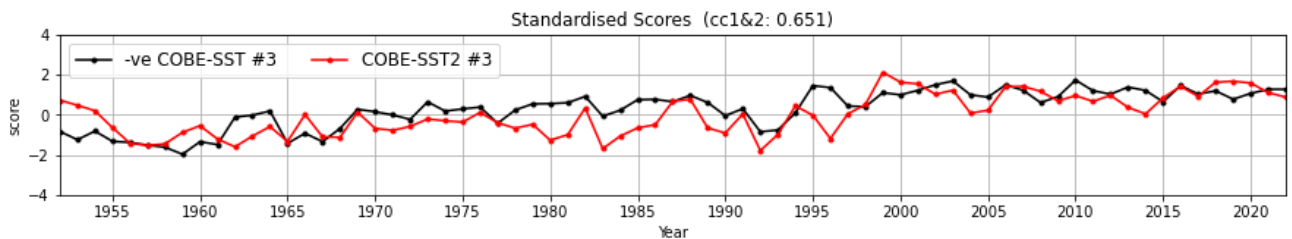

**Supplementary Figure S2-3a.** Comparison of standardised scores from the **3rd** rotated PCA mode of (black line) COBE-SST and (red line) COBE-SST2, for the period of 1952–2022.

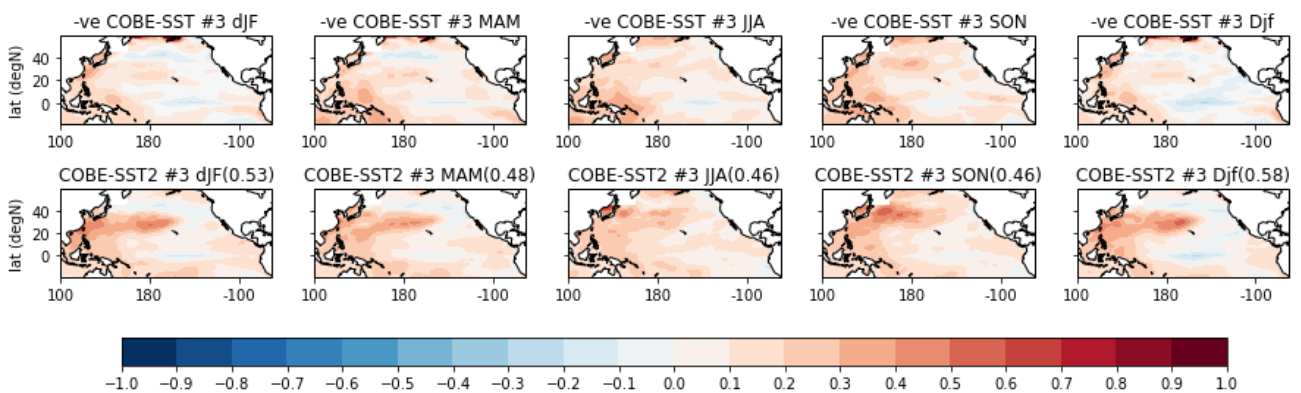

**Supplementary Figure S2-3b.** Comparison of loadings from the **3rd** rotated PCA mode of (top row) COBE-SST and (bottom row) COBE-SST2, for the period of 1952–2022.

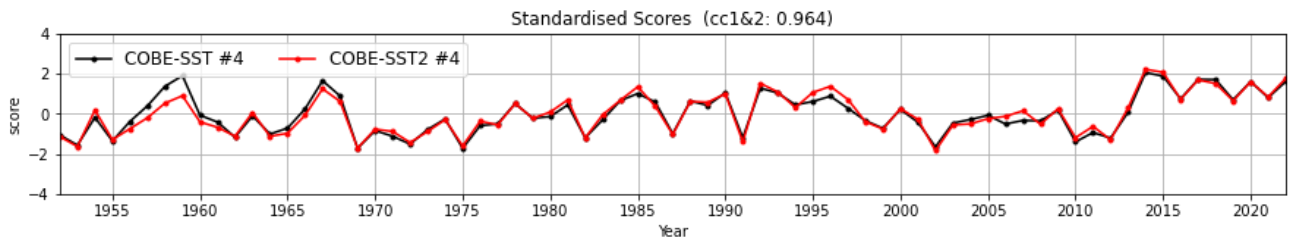

**Supplementary Figure S2-4a.** Comparison of standardised scores from the 4th rotated PCA mode of (black line) COBE-SST and (red line) COBE-SST2, for the period of 1952–2022.

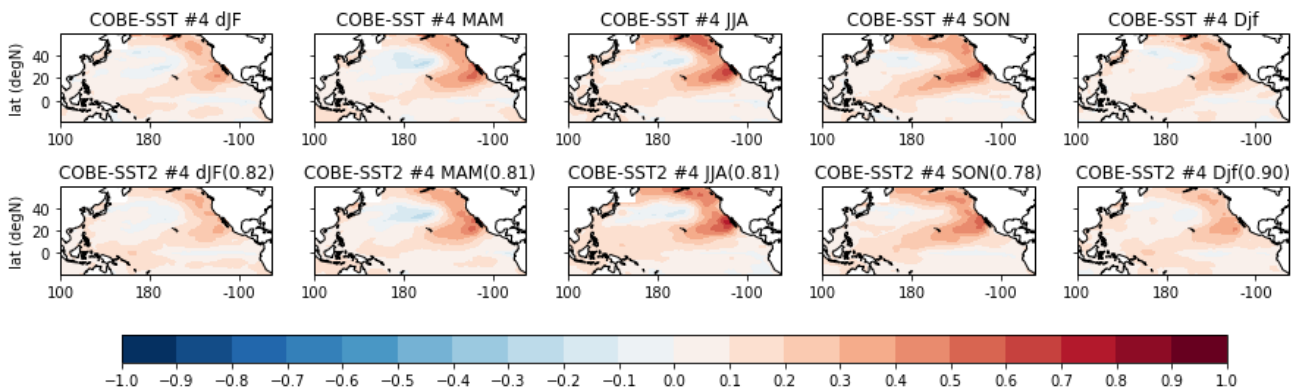

**Supplementary Figure S2-4b.** Comparison of loadings from the 4th rotated PCA mode of (top row) COBE-SST and (bottom row) COBE-SST2, for the period of 1952–2022.

## Supplementary Material Section 2

### Supplementary Table S2-1.

Meteorological stations used, in three columns, with names in English and Japanese. Years listed with the shaded station are those with insufficient data and not considered.

|                             |              |                                        |
|-----------------------------|--------------|----------------------------------------|
| Aburatsu                    | Kure         | Sasebo                                 |
| Akune                       | Kyoto        | Shimizu                                |
| Cape Muroto                 | Maizuru      | Shimonoseki                            |
| Fukuoka<br>1953, 1954, 1955 | Makurazaki   | Shionomisaki<br>1955, 1956, 1957, 1958 |
| Fukuyama                    | Matsue       | Sukumo                                 |
| Hagi                        | Matsuyama    | Sumoto                                 |
| Hamada                      | Miyakonojo   | Tadotsu                                |
| Hikone                      | Miyazaki     | Takamatsu                              |
| Himeji                      | Mount Unzen  | Tokushima                              |
| Hirado                      | Mt. Aso      | Tottori                                |
| Hiroshima                   | Nagasaki     | Toyooka                                |
| Hita                        | Nara<br>1952 | Tsu                                    |
| Hitoyoshi                   | Oita         | Tsuyama                                |
| Iizuka                      | Okayama      | Ueno                                   |
| Kagoshima                   | Osaka        | Ushibuka                               |
| Kobe                        | Owase        | Uwajima                                |
| Kochi                       | Sakai        | Wakayama                               |
| Kumamoto                    | Saga         | Yonago                                 |

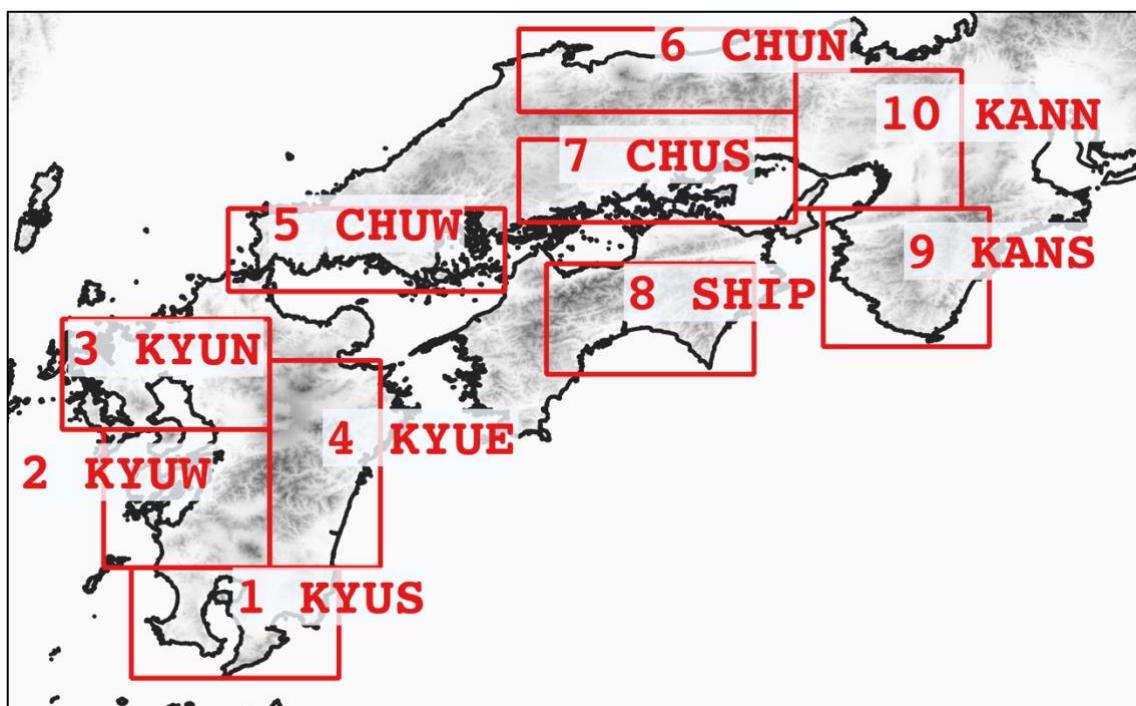

Figure S2-2. The 10 analysis regions defined in Table 1.



### Supplementary Material Section 3

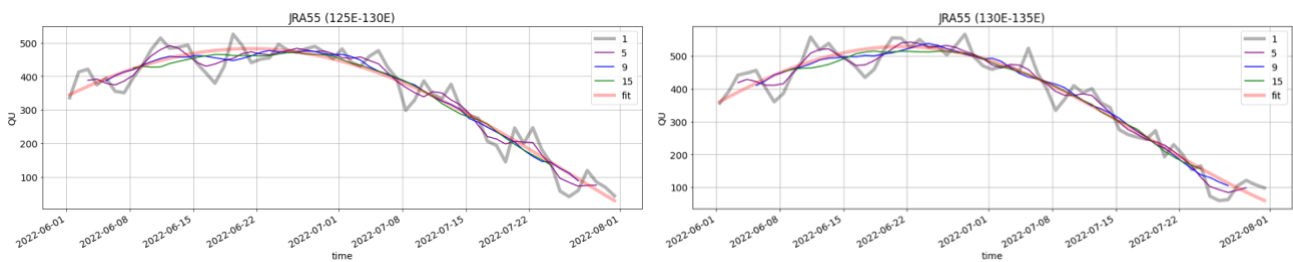

**Supplementary Figure S.3.1a.** Climatological seasonal cycle of the **zonal water vapour flux of the monsoon jet in JRA55**  $(QU)_0$  over (left) 125–130 °E and (right) 130–135 °E. Thick grey line shows the daily time series. Purple, blue and green lines show the results after 5-point, 9-point, and 15-point centered running means. Thick red line shows the fit to the logistic equation.

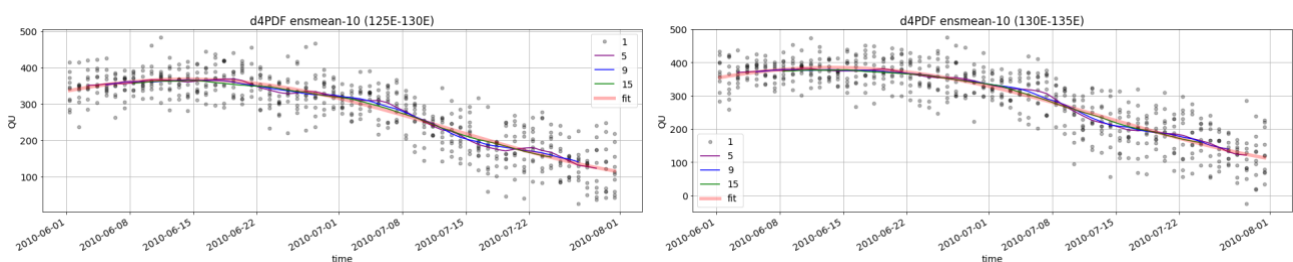

**Supplementary Figure S.3.1a.** Climatological seasonal cycle of the **zonal water vapour flux of the monsoon jet in d4PDF**  $(QU)_0$  over (left) 125–130 °E and (right) 130–135 °E. Thick grey line shows the daily time series. Purple, blue and green lines show the results after 5-point, 9-point, and 15-point centered running means. Thick red line shows the fit to the logistic equation.

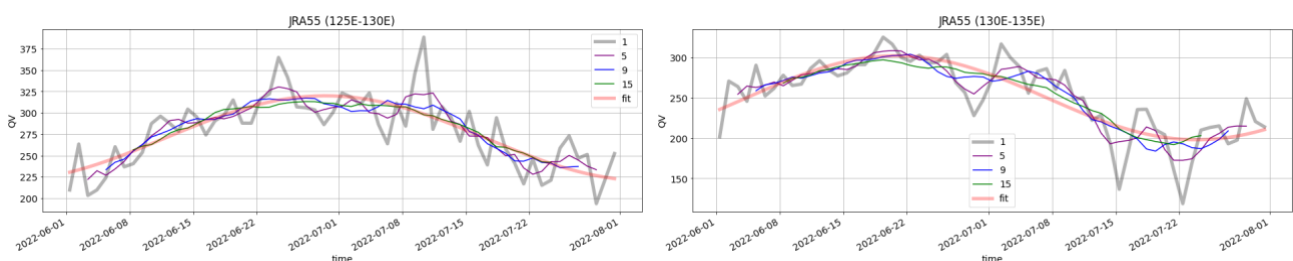

**Supplementary Figure S.3.2a.** Climatological seasonal cycle of the **meridional water vapour flux of the monsoon jet in JRA55**  $(QV)_0$  over (left) 125–130 °E and (right) 130–135 °E. Thick grey line shows the daily time series. Purple, blue and green lines show the results after 5-point, 9-point, and 15-point centered running means. Thick red line shows the fit to the logistic equation.

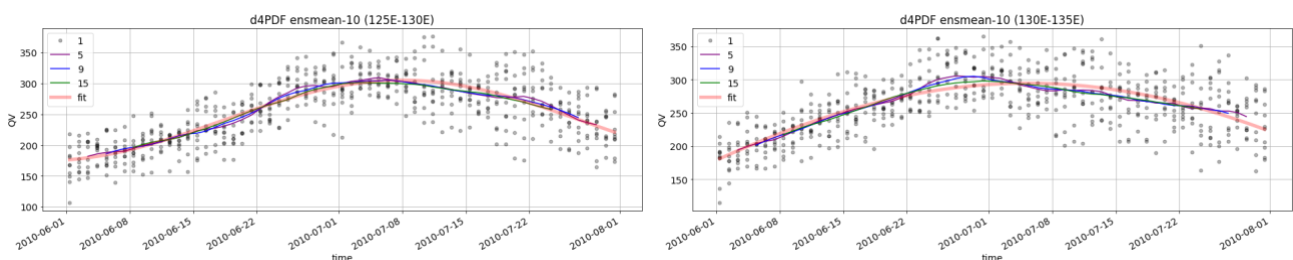

**Supplementary Figure S.3.2b.** Climatological seasonal cycle of the **meridional water vapour flux of the monsoon jet in d4PDF**  $(QV)_0$  over (left) 125–130 °E and (right) 130–135 °E. Thick grey line shows the daily time series. Purple, blue and green lines show the results after 5-point, 9-point, and 15-point centered running means. Thick red line shows the fit to the logistic equation.

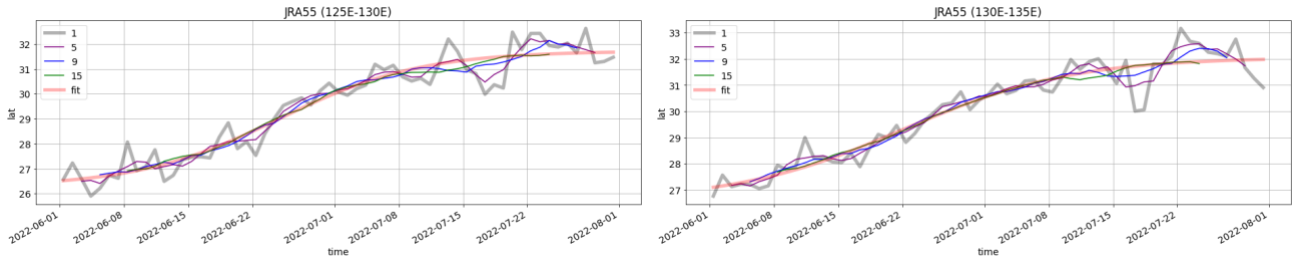

**Supplementary Figure S.3.3a.** Climatological seasonal cycle of the **latitude of the monsoon jet in JRA55** ( $JLat_0$ ) over (left) 125–130 °E and (right) 130–135 °E. Thick grey line shows the daily time series. Purple, blue and green lines show the results after 5-point, 9-point, and 15-point centered running means. Thick red line shows the fit to the logistic equation.

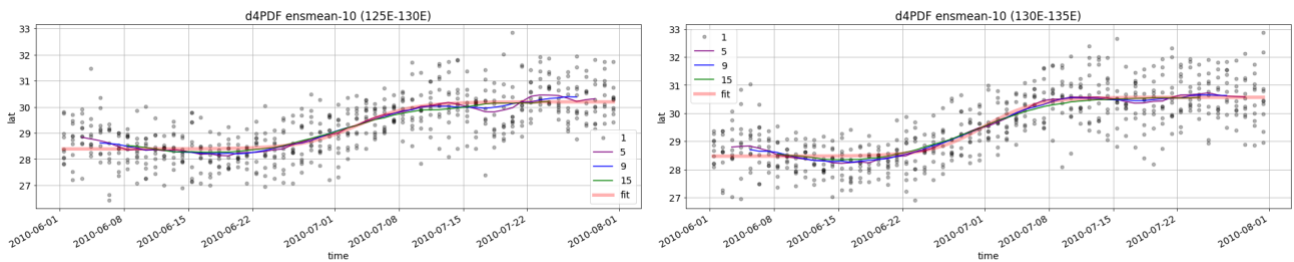

**Supplementary Figure S.3.3b.** Climatological seasonal cycle of the **latitude of the monsoon jet in d4PDF** ( $JLat_0$ ) over (left) 125–130 °E and (right) 130–135 °E. Thick grey line shows the daily time series. Purple, blue and green lines show the results after 5-point, 9-point, and 15-point centered running means. Thick red line shows the fit to the logistic equation.

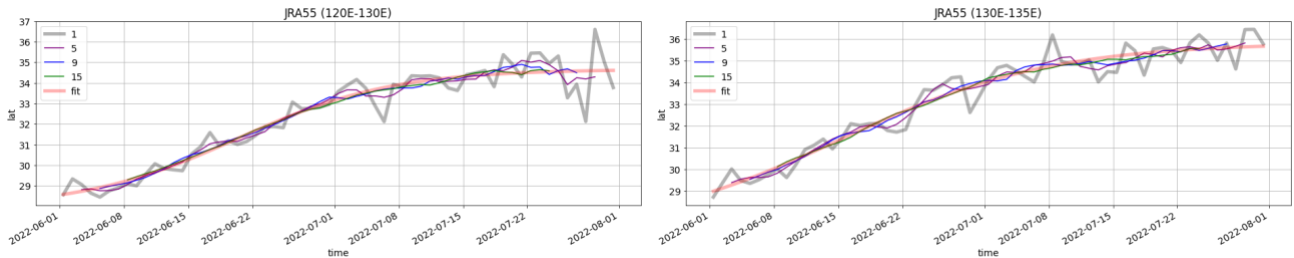

**Supplementary Figure S.3.4a.** Climatological seasonal cycle of the **latitude of the monsoon front in JRA55** ( $FLat_0$ ) over (left) 125–130 °E and (right) 130–135 °E. Thick grey line shows the daily time series. Purple, blue and green lines show the results after 5-point, 9-point, and 15-point centered running means. Thick red line shows the fit to the logistic equation.

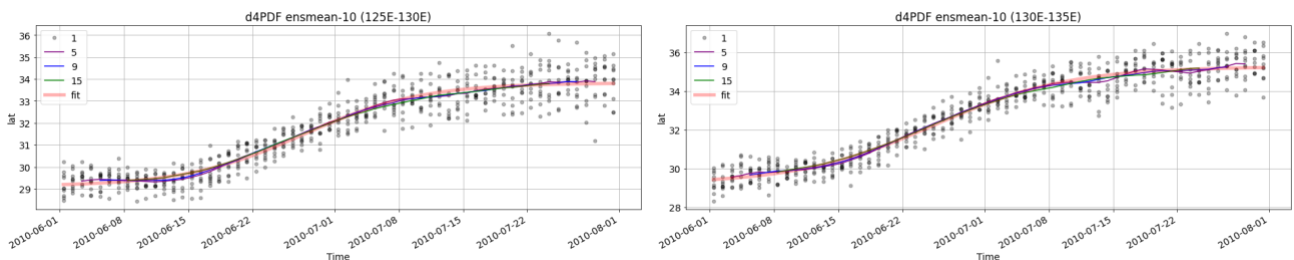

**Supplementary Figure S.3.4b.** Climatological seasonal cycle of the **latitude of the monsoon front in d4PDF** ( $FLat_0$ ) over (left) 125–130 °E and (right) 130–135 °E. Thick grey line shows the daily time series. Purple, blue and green lines show the results after 5-point, 9-point, and 15-point centered running means. Thick red line shows the fit to the logistic equation.

## Supplementary Material Section 4

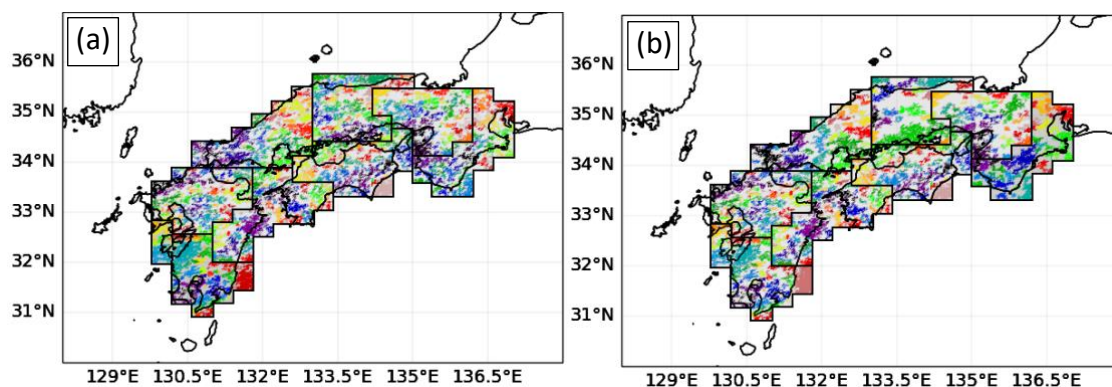

**Supplementary Figure S4-1.** Labels of clusters based on the time series of annual 99th percentile hourly rainfall from radar-AMeDAS. Colours only reflect the cluster numbering and do not reflect any units or magnitudes. Clustering was done separately on 8 pieces. (a) Using a minimum cluster size of 20. (b) Using different minimum cluster size values for each piece to maximise the clusters. Colorbars are not shown as the total number of clusters differed for each piece.

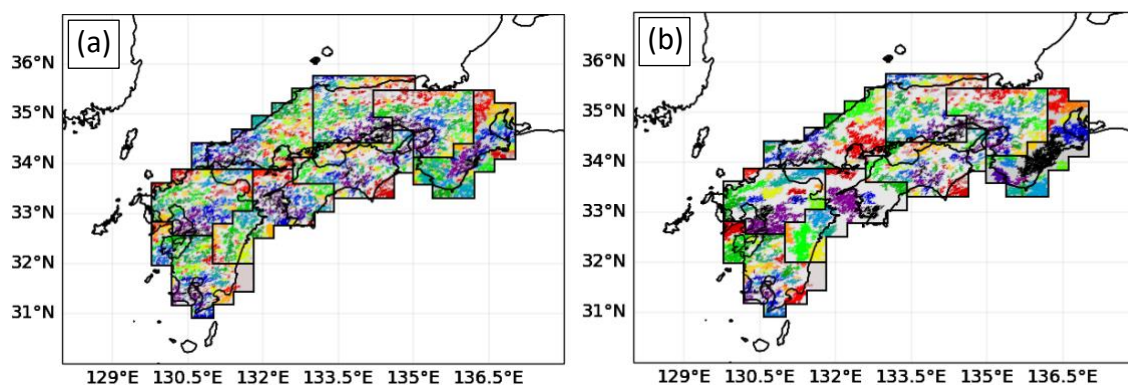

**Supplementary Figure S4-2.** Labels of clusters based on the time series of annual 90th percentile daily rainfall from radar-AMeDAS. Colours only reflect the cluster numbering and do not reflect any units or magnitudes. Clustering was done separately on 8 pieces. (a) Using a minimum cluster size of 20. (b) Using different minimum cluster size values for each piece to maximise the clusters. Colorbars are not shown as the total number of clusters differed for each piece.



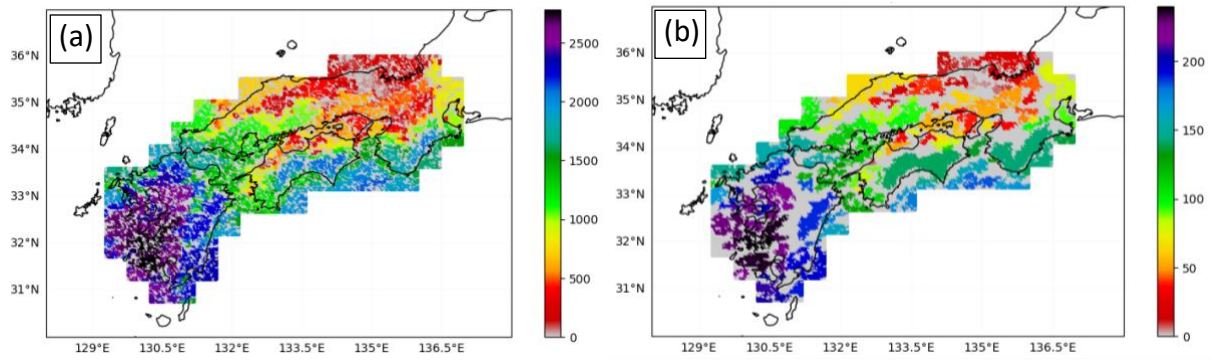

**Supplementary Figure S4-3.** Labels of clusters based on the time series of annual 99th percentile hourly rainfall from d4PDF. Colours only reflect the cluster numbering and do not reflect any units or magnitudes. Using a minimum cluster size of (a) 3, and (b) 18.

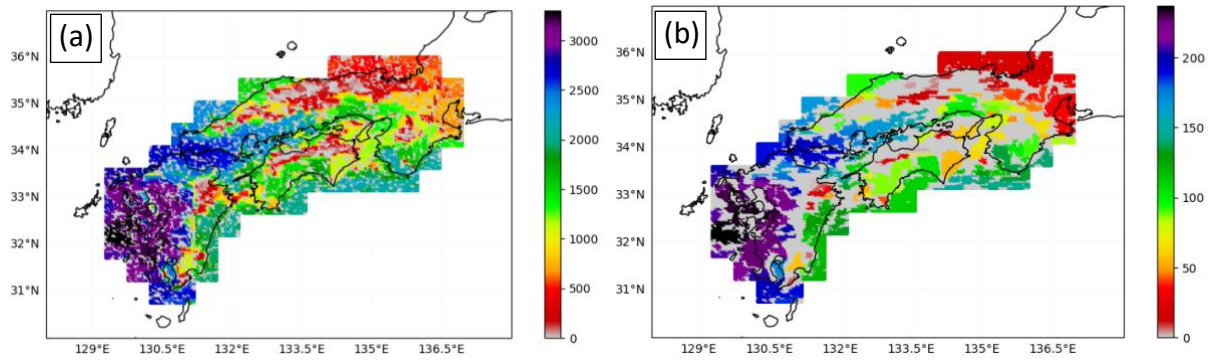

**Supplementary Figure S4-4.** Labels of clusters based on the time series of annual 90th percentile daily rainfall from d4PDF. Colours only reflect the cluster numbering and do not reflect any units or magnitudes. Using a minimum cluster size of (a) 3, and (b) 18.

**Table S3-1.** The value of  $c_{min}$  used in this study, and the number of clusters in square brackets.

| Piece | $c_{min}$ used for |                  |                  |                                           |
|-------|--------------------|------------------|------------------|-------------------------------------------|
|       | radar-AMeDAS       |                  | d4PDF            |                                           |
|       | Ph <sub>99</sub>   | Pd <sub>90</sub> | Ph <sub>99</sub> | Pd <sub>90</sub>                          |
| 1     | 52 [74]            | 221 [16]         | 18 [240]         | 18 [238]<br>(following Ph <sub>99</sub> ) |
| 2     | 44 [72]            | 37 [118]         |                  |                                           |
| 3     | 116 [25]           | 34 [112]         |                  |                                           |
| 4     | 89 [46]            | 87 [36]          |                  |                                           |
| 5     | 23 [175]           | 31 [128]         |                  |                                           |
| 6     | 24 [179]           | 424 [10]         |                  |                                           |
| 7     | 20 [216]           | 172 [19]         |                  |                                           |
| 8     | 23 [148]           | 37 [94]          |                  |                                           |

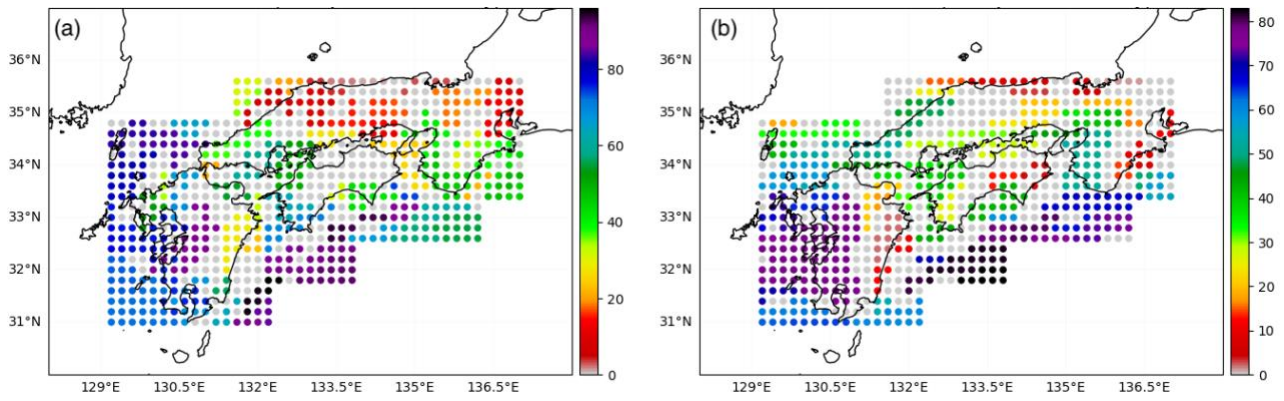

**Supplementary Figure S4-5.** Labels of clusters using a minimum cluster size of 3, from the 20 km version of d4PDF, based on the 50-member ensemble mean of (a) annual 99th percentile hourly rainfall, (b) annual 90th percentile daily rainfall. Colours only reflect the cluster numbering and do not reflect any units or magnitudes.

## Supplementary Material Section 5

The International Best Track Archive for Climate Stewardship (IBTrACS) is a tropical cyclone (TC) dataset that merges TC information from different meteorological agencies, available from the United States of America National Oceanic and Atmospheric Administration (<https://www.ncei.noaa.gov/products/international-best-track-archive>). The merged tracks from the Western Pacific subset of IBTrACS Version 4 was used, with 3-hourly resolution.

A day was defined as influenced by tropical cyclones (TC-day) if at any time of the day, the center of a TC was less than 1000 km from the centroid of the smallest circle covering the two regions. This classification attempted to exclude not just direct impacts such as from landfalling TCs, but also indirect impacts such as changes to the regional circulation. Sub-daily classification was not made, so that the same time periods were removed when processing both hourly and daily rainfall. The TC-days were removed, and the remaining days June–July for was 2006–2022 were 58, 58, 57, 59, 60, 53, 50, 52, 50, 49, 59, 59, 44, 49, 61, 51, and 52. Correlations were calculated with and without TC-days.

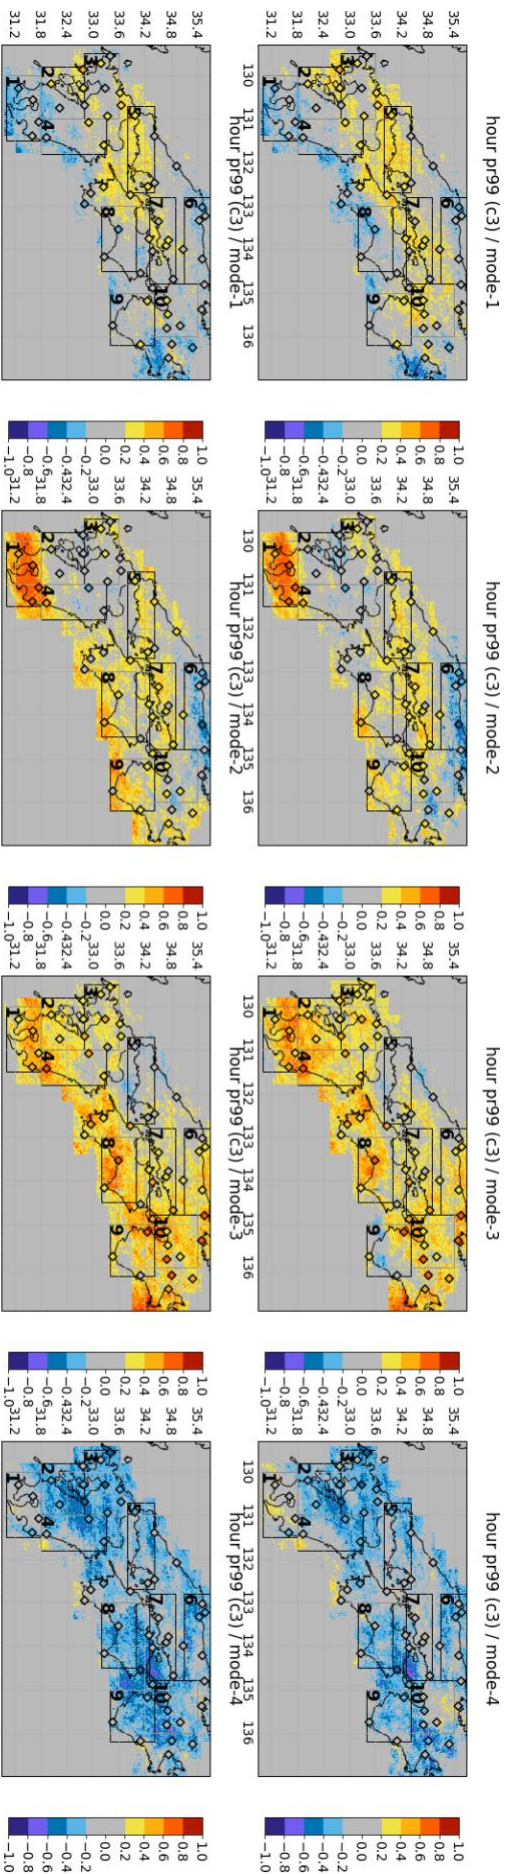

**Supplementary Figure S5-1.** Shading shows correlation coefficients (CCs) between the annual 99th percentile hourly rainfall of clusters from radar-AMeDAS, and (columns) the scores of the 5 Pacific SST modes. The minimum cluster size was 3. All grid-points belonging to the same cluster are colored with the same CC. The top row shows CCs using all days. The bottom row shows CCs with TC-days removed. Numbered boxes show the 10 analysis regions defined in Table 1.

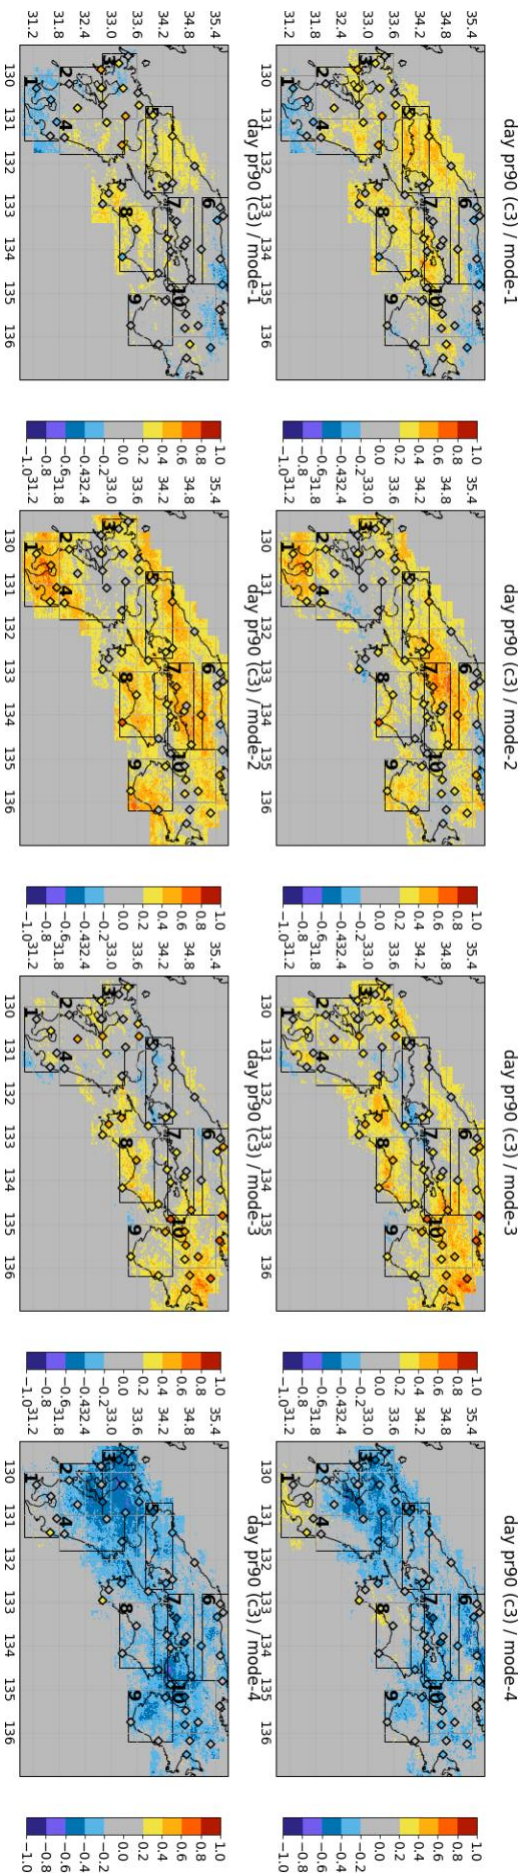

**Supplementary Figure S5-2.** Shading shows correlation coefficients (CCs) between the annual 90th percentile daily rainfall of clusters from radar-AMeDAS, and (columns) the scores of the 5 Pacific SST modes. The minimum cluster size was 3. All grid-points belonging to the same cluster are colored with the same CC. The top row shows CCs using all days. The bottom row shows CCs with TC-days removed. Numbered boxes show the 10 analysis regions defined in Table 1.

## Supplementary Material Section 6

**Supplementary Table S6-1a.** Spearman CCs using the “sets” method, between the time series of annual 99th percentile hourly rainfall and scores of the Pacific SST modes for the 10 regions defined in Table 1. The CCs are shown using the same colors as Figs 4 and 5. Percentile values were calculated using the “sets” method, where every set of grid-points and timestep is one sample. Under each mode, the 1st sub-column “gauge short” shows CCs calculated from individual gauges for the 2006–2022 period. The 2nd sub-column “radar” shows CCs calculated from radar-AMeDAS for the 2006–2022 short period. The 3rd sub-column “model” shows CCs calculated from d4PDF for the 1952–2010 long period, using the 10-member ensemble mean of extreme values. The 4th sub-column “gauge long” shows CCs calculated from individual gauges for the 1952–2010 period. The values in square brackets at the 2nd column are the CCs using the 99.9th percentile hourly rainfall, used as a robustness check for the value above it. Cells are shaded according to the criteria of Section 2.2.4. Cells are shaded light dots if criteria S1, S2, or L2 are failed. Cells are shaded with heavy dots if criterion L1 in Section 2.2.4 is fulfilled. Cells are shaded with downward hatches (\\) if criteria S3, S4 or S5 are failed. Cells are shaded with upward hatches (/) if criteria L3, L4 or L5 are failed. Cells are shaded with cross hatches (××) if both downward and upward hatches exist.

| 99th percentile hourly |                  | mode        |         |       |            |             |         |        |            |             |         |       |            |             |         |       |            |             |         |       |            |       |
|------------------------|------------------|-------------|---------|-------|------------|-------------|---------|--------|------------|-------------|---------|-------|------------|-------------|---------|-------|------------|-------------|---------|-------|------------|-------|
| Sets                   |                  | ENSO+       |         |       | ENSO-      |             |         | Trend+ |            |             | PDV     |       |            | ENSO-NC     |         |       |            |             |         |       |            |       |
| region                 | station          | gauge short | radar   | model | gauge long | gauge short | radar   | model  | gauge long | gauge short | radar   | model | gauge long | gauge short | radar   | model | gauge long | gauge short | radar   | model | gauge long |       |
| 1<br>KYUS              | Aburatsu 油津      | -0.06       |         |       | -0.25      | 0.61        | 0.72    | 0.47   | 0.02       | 0.44        |         |       | 0.24       | -0.23       |         |       | 0.02       | 0.19        |         |       | 0.16       | -0.13 |
|                        | Miyakonojo 都城    | -0.12       | -0.16   | 0.04  | -0.09      | 0.67        | [0.68]  |        | -0.09      | 0.38        | 0.58    | 0.21  | 0.22       | 0.14        | 0.08    | 0.11  | -0.13      | 0.10        | 0.16    | 0.16  | -0.15      |       |
|                        | Makurazaki 枕崎    | -0.23       | [-0.26] |       | -0.18      | 0.43        |         |        | 0.04       | 0.21        | [0.59]  |       | 0.19       | 0.01        | [0.02]  |       | -0.08      | -0.12       | [0.28]  | -0.16 | -0.13      |       |
|                        | Kagoshima 鹿児島    | -0.16       |         |       | -0.14      | 0.71        |         |        | -0.01      | 0.50        |         |       | 0.20       | 0.04        |         |       | -0.05      | 0.11        |         |       | -0.18      |       |
| 2<br>KYUW              | Nagasaki 長崎      | 0.45        |         |       | 0.29       | -0.15       |         |        | -0.25      | 0.33        |         |       | 0.03       | -0.16       |         |       | -0.12      | -0.10       |         |       | -0.30      |       |
|                        | Mount Unzen 雲仙岳  | 0.24        | 0.11    |       | 0.19       | 0.03        | 0.12    |        | -0.16      | 0.32        | 0.41    |       | 0.13       | -0.22       | -0.41   |       | -0.09      | -0.01       | -0.11   |       | -0.27      |       |
|                        | Hitoyoshi 人吉     | -0.02       | [-0.12] | 0.09  | 0.05       | -0.06       | [0.02]  | 0.35   | -0.14      | 0.30        | [0.43]  | 0.24  | 0.18       | -0.26       | [-0.31] | 0.10  | -0.07      | -0.04       | [-0.11] | -0.20 | -0.18      |       |
|                        | Kumamoto 熊本      | 0.13        |         |       | 0.22       | 0.08        |         |        | -0.17      | 0.42        |         |       | 0.10       | -0.44       |         |       | -0.16      | -0.05       |         |       | -0.18      |       |
| 3<br>KYUN              | Akune 阿久根        | 0.22        |         |       | 0.03       | 0.10        |         |        | -0.13      | 0.34        |         |       | 0.04       | -0.22       |         |       | -0.02      | 0.05        |         |       | -0.26      |       |
|                        | Saga 佐賀          | -0.03       |         |       | 0.19       | 0.25        |         |        | -0.02      | 0.41        |         |       | 0.15       | -0.42       |         |       | -0.17      | 0.01        |         |       | -0.10      |       |
|                        | Sasebo 佐世保       | 0.21        | 0.19    |       | 0.23       | 0.22        | 0.16    | 0.35   | -0.05      | 0.29        | 0.36    |       | 0.16       | -0.18       | -0.31   |       | -0.04      | 0.17        | -0.03   |       | -0.10      |       |
|                        | Hirado 平戸        | 0.13        | [0.05]  | 0.03  | 0.25       | 0.16        | [-0.01] |        | -0.06      | 0.34        | [0.32]  | 0.17  | 0.14       | -0.51       | [-0.32] | 0.08  | 0.01       | 0.17        | [0.02]  | -0.26 | -0.06      |       |
| 4<br>KYUE              | Hita 日田          | 0.20        |         |       | 0.12       | -0.13       |         |        | -0.15      | 0.09        |         |       | 0.17       | -0.30       |         |       | -0.04      | -0.15       |         |       | -0.12      |       |
|                        | Mount Aso 阿蘇山    | 0.27        |         |       | 0.15       | -0.29       | 0.12    |        | -0.24      | 0.58        | 0.52    |       | 0.17       | -0.38       |         |       | -0.11      | 0.11        | 0.01    |       | -0.06      |       |
|                        | Oita 大分          | 0.30        | -0.06   | 0.26  | 0.12       | 0.12        | 0.19    | 0.19   | -0.16      | 0.27        | [0.53]  | 0.15  | 0.29       | -0.30       | -0.31   | 0.08  | -0.14      | -0.13       | 0.15    | -0.15 | -0.13      |       |
|                        | Miyazaki 宮崎      | -0.15       | [0.19]  |       | -0.05      | 0.43        | [0.05]  |        | -0.06      | 0.60        |         |       | 0.34       | -0.11       | [-0.38] |       | -0.10      | 0.38        | [~]     |       | -0.04      |       |
| 5<br>CHUW              | Kure 呉           | 0.33        |         |       | 0.16       | 0.37        |         |        | -0.17      | 0.18        |         |       | 0.03       | -0.10       |         |       | -0.08      | 0.50        |         |       | -0.04      |       |
|                        | Hiroshima 広島     | 0.15        | 0.29    |       | 0.13       | 0.18        | 0.21    | 0.32   | -0.10      | 0.15        | 0.07    | 0.05  | 0.04       | 0.04        | -0.20   | 0.11  | -0.12      | 0.27        | 0.31    | -0.26 | ~          |       |
|                        | Shimonoseki 下関   | 0.21        | [0.19]  | 0.15  | 0.11       | 0.22        | [0.22]  |        | 0.03       | 0.01        | [-0.03] |       | 0.09       | -0.23       | [-0.28] |       | -0.07      | -0.01       | [0.27]  | -0.03 | 0.03       |       |
|                        | Hagi 萩           | 0.08        |         |       | 0.20       | 0.30        |         |        | -0.15      | 0.02        |         |       | -0.01      | -0.13       |         |       | -0.09      | 0.53        |         |       | -0.14      |       |
| 6<br>CHUN              | Sakai 堺          | 0.05        |         |       | 0.13       | -0.21       |         |        | -0.06      | 0.34        |         |       | -0.08      | -0.30       |         |       | -0.01      | 0.24        |         |       | -0.03      |       |
|                        | Yonago 米子        | -0.02       | -0.04   |       | 0.13       | -0.16       | -0.12   | 0.29   | -0.19      | 0.22        | 0.38    |       | -0.03      | -0.35       | -0.23   | -0.11 | -0.06      | 0.25        | 0.39    | -0.14 | -0.08      |       |
|                        | Tottori 鳥取       | -0.06       | [-0.08] | 0.35  | 0.12       | -0.50       | [-0.29] |        | -0.03      | 0.31        | [0.07]  | 0.04  | -0.06      | 0.11        | [-0.17] |       | 0.13       | -0.03       | [0.30]  |       | -0.22      |       |
|                        | Matsue 松江        | -0.31       |         |       | 0.15       | -0.34       |         |        | -0.01      | 0.13        |         |       | -0.09      | -0.13       |         |       | -0.03      | 0.22        |         |       | -0.01      |       |
| 7<br>CHUS              | Himeji 姫路        | 0.06        |         |       | -0.09      | 0.29        |         |        | -0.08      | 0.45        |         |       | -0.04      | -0.16       |         |       | -0.10      | 0.23        |         |       | -0.05      |       |
|                        | Okayama 岡山       | 0.35        | 0.26    | 0.47  | 0.12       | 0.37        | 0.34    | 0.21   | -0.13      | 0.31        | 0.19    |       | -0.10      | 0.12        | 0.14    | -0.04 | -0.04      | 0.64        | 0.38    | -0.13 | 0.03       |       |
|                        | Fukuyama 福山      | 0.15        | [0.23]  |       | 0.10       | 0.31        | [0.06]  |        | -0.07      | 0.28        | [0.24]  | 0.08  | 0.01       | -0.11       | [-0.24] |       | -0.10      | 0.32        | [-0.04] | -0.01 | -0.04      |       |
|                        | Takamatsu 高松     | 0.13        |         |       | 0.06       | 0.33        |         |        | 0.01       | 0.42        |         |       | 0.21       | -0.19       |         |       | -0.01      | 0.48        |         |       | -0.01      |       |
| 8<br>SHIP              | Ushibuka 牛深      | 0.34        |         |       | 0.21       | 0.03        |         |        | -0.32      | 0.17        |         |       | 0.26       | -0.07       |         |       | 0.09       | -0.20       |         |       | -0.36      |       |
|                        | Murotomisaki 室戸岬 | -0.12       | -0.06   | 0.22  | -0.03      | 0.52        | 0.22    | 0.11   | -0.08      | 0.34        | 0.40    | 0.19  | 0.08       | 0.05        | -0.27   | -0.01 | -0.23      | 0.17        | 0.12    | -0.23 | 0.07       |       |
|                        | Kochi 高知         | -0.29       | [~]     |       | -0.04      | 0.21        | [~]     |        | 0.13       | 0.62        | [0.34]  |       | 0.22       | -0.19       | [-0.08] |       | -0.11      | 0.31        | [-0.15] | -0.23 | -0.03      |       |
|                        | Owase 尾鷲         | 0.29        | 0.20    |       | ~          | 0.20        | 0.33    | 0.28   | -0.06      | -0.03       | 0.10    |       | -0.04      | 0.13        | -0.26   | 0.16  | -0.07      | -0.27       | -0.02   |       | -0.01      |       |
| 9<br>KANS              | Wakayama 和歌山     | 0.26        | [0.22]  | 0.09  | -0.13      | 0.35        | [0.46]  | 0.28   | 0.04       | 0.64        | [-0.04] | 0.12  | 0.09       | -0.23       | [-0.17] |       | -0.05      | 0.21        | [-0.09] | -0.01 | -0.04      |       |
|                        | Shionomisaki 潮岬  | 0.05        |         |       | 0.05       | 0.13        |         |        | -0.05      | 0.33        |         |       | ~          | 0.10        |         |       | ~          | 0.40        |         |       | -0.08      |       |
|                        | Kyoto 京都         | 0.05        |         |       | 0.02       | 0.20        |         |        | -0.01      | 0.30        |         |       | -0.15      | 0.10        |         |       | -0.11      | 0.17        |         |       | -0.07      |       |
| 10<br>KANN             | Osaka 大阪         | 0.35        | 0.34    | 0.35  | -0.06      | ~           | 0.22    | 0.28   | -0.03      | 0.30        | 0.41    | -0.06 | 0.04       | -0.23       | -0.12   | 0.10  | -0.05      | 0.11        | 0.17    | 0.01  | -0.06      |       |
|                        | Nara 奈良          | 0.14        | [0.06]  | 0.35  | -0.05      | 0.29        | [-0.30] | 0.28   | -0.14      | 0.60        | [0.36]  |       | -0.11      | -0.18       | [-0.15] |       | 0.06       | 0.52        | [-0.10] |       | -0.03      |       |
|                        | Kobe 神戸          | 0.21        |         |       | -0.18      | 0.22        |         |        | 0.06       | 0.27        |         |       | -0.06      | -0.15       |         |       | 0.09       | 0.21        |         |       | 0.04       |       |

**Supplementary Table S6-1b.** Spearman CCs using the “box” method, between the time series of annual 99th percentile hourly rainfall and scores of the Pacific SST modes for the 10 regions defined in Table 1. The CCs are shown using the same colors as Figs 4 and 5. Percentile values were calculated using the “sets” method, where every set of grid-points and timestep is one sample. Under each mode, the 1st sub-column “gauge short” shows CCs calculated from individual gauges for the 2006–2022 period. The 2nd sub-column “radar” shows CCs calculated from radar-AMeDAS for the 2006–2022 short period. The 3rd sub-column “model” shows CCs calculated from d4PDF for the 1952–2010 long period, using the 10-member ensemble mean of extreme values. The 4th sub-column “gauge long” shows CCs calculated from individual gauges for the 1952–2010 period. Cells are shaded according to the criteria of Section 2.2.4. Cells are shaded light dots if criteria S1, S2, or L2 are failed. Cells are shaded with heavy dots if criterion L1 in Section 2.2.4 is fulfilled. Cells are shaded with downward hatches (\\) if criteria S3, S4 or S5 are failed. Cells are shaded with upward hatches (/) if criteria L3, L4 or L5 are failed. Cells are shaded with cross hatches (x) if both downward and upward hatches exist.

| 99th percentile hourly |              |     | mode        |       |       |            |             |       |       |            |             |       |       |            |             |       |       |            |             |       |       |            |
|------------------------|--------------|-----|-------------|-------|-------|------------|-------------|-------|-------|------------|-------------|-------|-------|------------|-------------|-------|-------|------------|-------------|-------|-------|------------|
| Box                    |              |     | ENSO+       |       |       |            | ENSO-       |       |       |            | Trend+      |       |       |            | PDV         |       |       |            | ENSO-NC     |       |       |            |
| region                 | station      |     | gauge short | radar | model | gauge long | gauge short | radar | model | gauge long | gauge short | radar | model | gauge long | gauge short | radar | model | gauge long | gauge short | radar | model | gauge long |
| 1<br>KYUS              | Aburatsu     | 油津  | -0.06       |       |       | -0.25      | 0.61        |       |       | 0.02       | 0.44        |       |       | 0.24       | -0.23       |       |       | 0.02       | 0.19        |       |       | -0.13      |
|                        | Miyakonojo   | 都城  | -0.12       | -0.44 | -0.08 | -0.09      | 0.67        | 0.51  | 0.46  | -0.09      | 0.38        | 0.57  | 0.08  | 0.22       | 0.14        | -0.17 | 0.20  | -0.13      | 0.10        | 0.19  | -0.03 | -0.15      |
|                        | Makurazaki   | 枕崎  | -0.23       |       |       | -0.18      | 0.43        |       |       | 0.04       | 0.21        |       |       | 0.19       | 0.01        |       |       | -0.08      | -0.12       |       |       | -0.13      |
|                        | Kagoshima    | 鹿児島 | -0.16       |       |       | -0.14      | 0.71        |       |       | -0.01      | 0.50        |       |       | 0.20       | 0.04        |       |       | -0.05      | 0.11        |       |       | -0.18      |
| 2<br>KYUW              | Nagasaki     | 長崎  | 0.45        |       |       | 0.29       |             |       |       | -0.25      | 0.33        |       |       | 0.03       | -0.16       |       |       | -0.12      | -0.10       |       |       | -0.30      |
|                        | Mount Unzen  | 雲仙岳 | 0.24        |       |       | 0.19       | 0.03        |       |       | -0.16      | 0.32        |       |       | 0.13       | -0.22       |       |       | -0.09      | -0.01       |       |       | -0.27      |
|                        | Hitoyoshi    | 人吉  | -0.02       | -0.16 | -0.18 | 0.05       | -0.06       | -0.01 | 0.29  | -0.14      | 0.30        | 0.38  | 0.16  | 0.18       | -0.26       | -0.20 | 0.11  | -0.07      | -0.04       | -0.07 | -0.11 | -0.18      |
|                        | Kumamoto     | 熊本  | 0.13        |       |       | 0.22       | 0.08        |       |       | -0.17      | 0.42        |       |       | 0.10       | -0.44       |       |       | -0.16      | -0.05       |       |       | -0.18      |
|                        | Akune        | 阿久根 | 0.22        |       |       | 0.03       | 0.10        |       |       | -0.13      | 0.34        |       |       | 0.04       | -0.22       |       |       | -0.02      | 0.05        |       |       | -0.26      |
| 3<br>KYUN              | Saga         | 佐賀  | -0.03       |       |       | 0.19       | 0.25        |       |       | -0.02      | 0.41        |       |       | 0.15       | -0.42       |       |       | -0.17      | 0.01        |       |       | -0.10      |
|                        | Sasebo       | 佐世保 | 0.21        | ~     |       | 0.23       | 0.22        | -0.06 | 0.23  | -0.05      | 0.29        |       |       | 0.16       | -0.18       | -0.43 | 0.08  | -0.04      | 0.17        | 0.04  | 0.27  | -0.10      |
|                        | Hirado       | 平戸  | 0.13        |       |       | 0.25       | 0.16        |       |       | -0.06      | 0.34        | 0.37  | 0.11  | 0.14       | -0.51       |       |       | 0.01       | -0.03       | -0.04 |       | -0.06      |
|                        | Hita         | 日田  | 0.20        |       |       | 0.12       | -0.13       |       |       | -0.15      | 0.09        |       |       | 0.17       | -0.30       |       |       | -0.04      | -0.15       |       |       | -0.12      |
| 4<br>KYUE              | Mount Aso    | 阿蘇山 | 0.27        |       |       | 0.15       | -0.29       |       |       | -0.24      | 0.58        |       |       | 0.17       | -0.38       |       |       | -0.11      | -0.11       |       |       | -0.06      |
|                        | Oita         | 大分  | 0.30        | -0.29 | -0.15 | 0.12       | 0.12        | -0.14 | 0.06  | -0.16      | 0.27        | 0.48  | 0.15  | 0.29       | -0.30       | -0.39 | 0.25  | -0.14      | -0.13       | -0.12 | -0.13 | -0.13      |
|                        | Miyazaki     | 宮崎  | -0.15       |       |       | -0.05      | 0.43        |       |       | -0.06      | 0.60        |       |       | 0.34       | -0.11       |       |       | -0.10      | 0.38        |       |       | -0.04      |
| 5<br>CHUW              | Kure         | 呉   | 0.33        |       |       | 0.16       | 0.37        |       |       | -0.17      | 0.18        |       |       | 0.03       | -0.10       |       |       | -0.08      | 0.50        |       |       | -0.04      |
|                        | Hiroshima    | 広島  | 0.15        | 0.15  | 0.01  | 0.13       | 0.18        | 0.03  | 0.20  | -0.10      | 0.15        | 0.04  | 0.19  | ~          | 0.04        | -0.43 | 0.10  | -0.12      | 0.27        | 0.19  | -0.16 | ~          |
|                        | Shimonoseki  | 下関  | 0.21        |       |       | 0.11       | 0.22        |       |       | 0.03       | 0.01        |       |       | 0.09       | -0.23       |       |       | -0.07      | -0.01       |       |       | 0.03       |
|                        | Hagi         | 萩   | 0.08        |       |       | 0.20       | 0.30        |       |       | -0.15      | 0.02        |       |       | -0.01      | -0.13       |       |       | -0.09      | 0.53        |       |       | -0.14      |
| 6<br>CHUN              | Sakai        | 堺   | -0.05       |       |       | 0.13       | -0.21       |       |       | -0.06      | 0.34        |       |       | -0.08      | -0.30       |       |       | -0.01      | 0.24        |       |       | -0.03      |
|                        | Yonago       | 米子  | -0.02       | -0.20 | -0.02 | 0.13       | -0.16       | -0.31 | 0.23  | -0.19      | 0.22        | -0.16 | -0.02 | -0.03      | -0.35       | -0.14 | -0.05 | -0.06      | 0.25        | ~     | -0.10 | -0.08      |
|                        | Tottori      | 鳥取  | -0.06       |       |       | 0.12       | -0.50       |       |       | -0.03      | 0.31        |       |       | -0.06      | 0.11        |       |       | 0.13       | -0.03       |       |       | -0.22      |
|                        | Matsue       | 松江  | -0.31       |       |       | 0.15       | -0.34       |       |       | -0.01      | 0.13        |       |       | -0.09      | -0.13       |       |       | -0.03      | 0.22        |       |       | -0.01      |
| 7<br>CHUS              | Himeji       | 姫路  | 0.06        |       |       | -0.09      | 0.29        |       |       | -0.08      | 0.45        |       |       | -0.04      | -0.16       |       |       | -0.10      | 0.23        |       |       | -0.05      |
|                        | Okayama      | 岡山  | 0.35        |       |       | 0.12       | 0.37        |       |       | -0.13      | 0.31        |       |       | -0.10      | 0.12        |       |       | -0.04      | 0.64        |       |       | 0.03       |
|                        | Fukuyama     | 福山  | 0.15        | 0.13  | 0.19  | 0.10       | 0.31        | -0.09 | 0.08  | -0.07      | 0.28        | 0.10  | -0.11 | 0.01       | -0.11       | -0.29 | 0.06  | -0.10      | 0.32        | -0.26 | ~     | -0.04      |
|                        | Takamatsu    | 高松  | 0.13        |       |       | 0.06       | 0.33        |       |       | 0.01       | 0.42        |       |       | 0.21       | -0.19       |       |       | -0.01      | 0.48        |       |       | -0.01      |
|                        | Ushibuka     | 牛深  | 0.34        |       |       | 0.21       | 0.03        |       |       | -0.32      | 0.17        |       |       | 0.26       | -0.07       |       |       | -0.09      | -0.20       |       |       | -0.36      |
| 8<br>SHIP              | Murotomisaki | 室戸岬 | -0.12       | 0.03  | -0.06 | -0.03      | 0.52        | ~     | -0.08 | -0.08      | 0.34        | 0.71  | 0.25  | 0.08       | 0.05        | 0.02  | -0.01 | -0.23      | 0.17        | 0.13  | ~     | 0.07       |
|                        | Kochi        | 高知  | -0.29       |       |       | -0.04      | 0.21        |       |       | 0.13       | 0.62        |       |       | 0.22       | -0.19       |       |       | -0.11      | 0.31        |       |       | -0.03      |
| 9<br>KANS              | Owase        | 尾鷲  | 0.29        |       |       | ~          | 0.20        |       |       | -0.06      | -0.03       |       |       | -0.04      | 0.13        |       |       | -0.07      | -0.27       |       |       | -0.01      |
|                        | Wakayama     | 和歌山 | 0.26        | -0.09 | -0.02 | -0.13      | 0.35        | -0.05 | 0.06  | 0.04       | 0.64        | 0.45  | 0.15  | 0.09       | -0.23       | -0.25 | 0.07  | -0.05      | 0.21        | 0.02  | 0.02  | -0.04      |
|                        | Shionomisaki | 潮岬  | 0.05        |       |       | 0.05       | 0.13        |       |       | -0.05      | 0.33        |       |       | ~          | 0.10        |       |       | ~          | 0.40        |       |       | -0.08      |
| 10<br>KANN             | Kyoto        | 京都  | 0.05        |       |       | 0.02       | 0.20        |       |       | -0.01      | 0.30        |       |       | -0.15      | 0.10        |       |       | -0.11      | 0.17        |       |       | -0.07      |
|                        | Osaka        | 大阪  | 0.35        | -0.19 | 0.20  | -0.06      | ~           | -0.65 | 0.11  | -0.03      | 0.30        | 0.15  | -0.07 | 0.04       | -0.23       |       |       | -0.05      | 0.11        | -0.14 | -0.07 | -0.06      |
|                        | Nara         | 奈良  | 0.14        |       |       | -0.05      | 0.29        |       |       | -0.14      | 0.60        |       |       | -0.11      | -0.18       | -0.29 | 0.10  | 0.06       | 0.52        |       |       | -0.03      |
|                        | Kobe         | 神戸  | 0.21        |       |       | -0.18      | 0.22        |       |       | 0.06       | 0.27        |       |       | -0.06      | -0.15       |       |       | 0.09       | 0.21        |       |       | 0.04       |

**Supplementary Table S6-2a.** Spearman CCs using the “sets” method, between the time series of annual 90th percentile **daily rainfall** and scores of the Pacific SST modes for the 10 regions defined in Table 1. The CCs are shown using the same colors as Figs 4 and 5. Percentile values were calculated using the “sets” method, where every set of grid-points and timestep is one sample. Under each mode, the 1st sub-column “gauge short” shows CCs calculated from individual gauges for the 2006–2022 period. The 2nd sub-column “radar” shows CCs calculated from radar-AMeDAS for the 2006–2022 short period. The 3rd sub-column “model” shows CCs calculated from d4PDF for the 1952–2010 long period, using the 10-member ensemble mean of extreme values. The 4th sub-column “gauge long” shows CCs calculated from individual gauges for the 1952–2010 period. The values in square brackets at the 2nd column are the CCs using the 99.9th percentile hourly rainfall, used as a robustness check for the value above it. Cells are shaded according to the criteria of Section 2.2.4. Cells are shaded light dots if criteria S1, S2, or L2 are failed. Cells are shaded with heavy dots if criterion L1 in Section 2.2.4 is fulfilled. Cells are shaded with downward hatches (\\) if criteria S3, S4 or S5 are failed. Cells are shaded with upward hatches (/) if criteria L3, L4 or L5 are failed. Cells are shaded with cross hatches (××) if both downward and upward hatches exist.

| 90th percentile daily |                  | mode        |         |       |            |             |         |       |            |             |         |       |            |             |         |       |            |             |         |       |            |
|-----------------------|------------------|-------------|---------|-------|------------|-------------|---------|-------|------------|-------------|---------|-------|------------|-------------|---------|-------|------------|-------------|---------|-------|------------|
| Sets                  |                  | ENSO+       |         |       |            | ENSO-       |         |       |            | Trend+      |         |       |            | PDV         |         |       |            | ENSO-NC     |         |       |            |
| region                | station          | gauge short | radar   | model | gauge long | gauge short | radar   | model | gauge long | gauge short | radar   | model | gauge long | gauge short | radar   | model | gauge long | gauge short | radar   | model | gauge long |
| 1<br>KYUS             | Aburatsu 油津      | 0.03        |         |       | -0.29      | 0.39        |         |       | 0.06       | 0.08        |         |       | 0.02       | 0.33        |         |       | -0.11      | 0.08        |         |       | -0.02      |
|                       | Miyakonojo 都城    | -0.25       | -0.09   |       | -0.11      | 0.45        |         |       | 0.01       | -0.01       | 0.19    |       | 0.12       | 0.07        | 0.15    |       | -0.25      | -0.11       | -0.08   |       | -0.02      |
|                       | Makurazaki 杵崎    | -0.36       | [-0.16] | -0.01 | -0.02      | 0.38        |         | 0.5   | 0.10       | 0.16        | [0.49]  |       | 0.18       | 0.07        | [0.21]  | 0.19  | -0.22      | -0.30       | [0.24]  | -0.05 | -0.11      |
|                       | Kagoshima 鹿児島    | -0.28       |         |       | -0.10      | 0.52        |         |       | 0.14       | 0.23        |         |       | 0.13       | 0.02        |         |       | -0.24      | -0.04       |         |       | -0.07      |
| 2<br>KYUW             | Nagasaki 長崎      | 0.49        |         |       | 0.26       | 0.18        |         |       | -0.20      | 0.23        |         |       | 0.11       | 0.04        |         |       | -0.20      | -0.04       |         |       | -0.33      |
|                       | Mount Unzen 雲仙岳  | 0.33        |         |       | 0.20       | 0.22        |         |       | -0.19      | 0.06        |         |       | 0.15       | -0.12       |         |       | -0.12      | -0.24       |         |       | -0.31      |
|                       | Hitoyoshi 人吉     | 0.21        | 0.09    | 0.02  | 0.11       | 0.11        | 0.14    | 0.41  | -0.17      | 0.47        | 0.10    | 0.18  | 0.10       | -0.12       | -0.28   | 0.03  | -0.15      | 0.14        | -0.27   | 0.26  | -0.15      |
|                       | Kumamoto 熊本      | 0.01        | [0.22]  |       | 0.11       | 0.03        | [-0.16] |       | -0.13      | 0.44        | [0.39]  |       | 0.29       | -0.54       | [-0.22] |       | -0.16      | -0.10       | [-0.08] |       | -0.22      |
| 3<br>KYUN             | Akune 阿久根        | 0.17        |         |       | -0.01      | 0.25        |         |       | -0.09      | 0.18        |         |       | 0.14       | -0.07       |         |       | -0.13      | -0.03       |         |       | -0.17      |
|                       | Saga 佐賀          | 0.31        |         |       | 0.24       | -0.07       |         |       | -0.22      | 0.09        |         |       | 0.08       | -0.40       |         |       | -0.17      | -0.27       |         |       | -0.23      |
|                       | Sasebo 佐世保       | 0.22        | 0.15    | 0.01  | 0.27       | 0.16        | 0.14    | 0.33  | -0.08      | 0.15        | 0.23    | 0.10  | 0.07       | -0.43       | -0.51   | 0.02  | -0.05      | -0.11       | -0.13   | -0.30 | -0.22      |
|                       | Hirado 平戸        | 0.17        | [0.11]  |       | 0.27       | 0.13        | [-0.05] |       | -0.19      | 0.23        | [0.17]  |       | 0.03       | -0.38       | [-0.23] |       | -0.06      | -0.19       | [0.04]  |       | -0.15      |
| 4<br>KYUE             | Hita 日田          | 0.41        |         |       | 0.26       | 0.09        |         |       | -0.11      | 0.07        |         |       | 0.03       | -0.24       |         |       | -0.08      | -0.23       |         |       | -0.07      |
|                       | Mount Aso 阿蘇山    | 0.34        | 0.21    |       | 0.21       | -0.08       |         |       | 0.11       | 0.17        |         |       | -0.16      | 0.31        | 0.08    |       | 0.22       | -0.18       | -0.12   | 0.21  | -0.16      |
|                       | Oita 大分          | 0.46        | [0.10]  | 0.07  | 0.16       | -0.05       | [-0.05] | 0.17  | -0.07      | 0.15        | [0.58]  | 0.13  | 0.18       | -0.24       | [-0.21] | 0.21  | -0.21      | -0.14       | [0.08]  | -0.13 | -0.08      |
|                       | Miyazaki 宮崎      | -0.04       |         |       | -0.04      | 0.23        |         |       | 0.06       | 0.12        |         |       | 0.23       | 0.06        |         |       | -0.19      | 0.37        |         |       | 0.01       |
| 5<br>CHUW             | Kure 呉           | 0.10        |         |       | 0.13       | 0.30        |         |       | -0.19      | 0.23        |         |       | 0.10       | -0.36       |         |       | -0.09      | 0.43        |         |       | -0.19      |
|                       | Hiroshima 広島     | 0.14        | 0.38    |       | 0.12       | 0.35        | 0.23    | 0.34  | -0.04      | 0.24        | 0.04    | 0.03  | -0.20      | -0.25       | 0.11    | -0.10 | -0.10      | 0.24        | 0.01    |       | -0.10      |
|                       | Shimonoseki 下関   | 0.22        | [0.22]  | 0.05  | 0.17       | 0.09        | [0.22]  |       | -0.03      | -0.05       | [0.19]  | 0.03  | 0.06       | -0.46       | [-0.11] | 0.11  | -0.07      | 0.15        | [0.43]  | -0.25 | -0.04      |
|                       | Hagi 萩           | 0.31        |         |       | 0.19       | 0.40        |         |       | -0.16      | 0.08        |         |       | 0.01       | -0.39       |         |       | -0.07      | 0.34        |         |       | -0.16      |
| 6<br>CHUN             | Sakai 堺          | -0.20       |         |       | 0.17       | 0.19        |         |       | 0.01       | 0.44        |         |       | -0.10      | -0.10       |         |       | -0.02      | 0.23        |         |       | -0.10      |
|                       | Yonago 米子        | -0.27       | 0.01    | 0.14  | 0.14       | -0.01       | 0.21    | 0.31  | -0.04      | 0.36        | 0.21    | -0.01 | -0.08      | -0.22       | -0.29   | -0.03 | -0.05      | 0.23        | 0.30    | -0.03 | -0.15      |
|                       | Tottori 鳥取       | -0.04       | [0.09]  |       | 0.01       | 0.19        | [-0.27] |       | -0.12      | 0.38        | [0.31]  |       | ~          | -0.01       | [-0.16] |       | -0.03      | 0.10        | [0.42]  |       | -0.18      |
|                       | Matsue 松江        | -0.16       |         |       | 0.08       | -0.04       |         |       | 0.02       | 0.06        |         |       | -0.10      | -0.03       |         |       | ~          | 0.31        |         |       | -0.04      |
| 7<br>CHUS             | Himeji 姫路        | 0.01        |         |       | -0.18      | 0.30        |         |       | -0.03      | 0.59        |         |       | -0.07      | -0.26       |         |       | -0.10      | 0.34        |         |       | 0.06       |
|                       | Okayama 岡山       | 0.03        | 0.29    | 0.19  | 0.08       | 0.33        | 0.47    | 0.26  | -0.03      | 0.33        | 0.29    | -0.03 | 0.14       | -0.44       | -0.26   | 0.04  | -0.15      | 0.21        | 0.19    | -0.12 | -0.10      |
|                       | Fukuyama 福山      | -0.15       | [0.17]  |       | 0.07       | 0.50        | [0.08]  |       | -0.10      | 0.23        | [0.15]  |       | 0.09       | -0.49       | [0.07]  |       | -0.18      | 0.23        | [0.32]  |       | 0.07       |
|                       | Takamatsu 高松     | 0.11        |         |       | 0.07       | 0.22        |         |       | -0.14      | 0.32        |         |       | 0.06       | -0.19       |         |       | -0.05      | 0.01        |         |       | 0.07       |
| 8<br>SHIP             | Ushibuka 牛深      | 0.19        |         |       | 0.11       | 0.07        |         |       | -0.19      | 0.07        |         |       | 0.16       | -0.04       |         |       | -0.13      | -0.19       |         |       | -0.23      |
|                       | Murotomisaki 室戸岬 | -0.35       | 0.22    |       | -0.10      | 0.63        | 0.18    | 0.09  | -0.09      | 0.28        | 0.36    |       | 0.15       | -0.03       | 0.02    |       | -0.24      | 0.16        | 0.14    | -0.06 | -0.14      |
|                       | Kochi 高知         | 0.15        | [-0.27] | 0.12  | 0.04       | 0.25        | [0.07]  |       | 0.03       | 0.50        | [0.14]  | 0.15  | 0.10       | 0.12        | [-0.11] | 0.16  | -0.24      | 0.18        | [0.04]  | -0.06 | -0.14      |
|                       | Owase 尾鷲         | 0.05        |         |       | 0.12       | 0.19        |         |       | -0.03      | 0.28        | 0.20    | -0.01 | 0.03       | 0.07        | -0.30   | 0.21  | -0.06      | 0.16        | 0.02    |       | 0.03       |
| 9<br>KANS             | Wakayama 和歌山     | 0.06        |         | 0.11  | -0.14      | 0.22        | [0.26]  | 0.33  | -0.08      | 0.49        | [-0.02] | -0.01 | 0.08       | -0.40       | [-0.17] | 0.21  | -0.15      | -0.08       | [0.09]  | -0.02 | 0.03       |
|                       | Shionomisaki 潮岬  | -0.09       |         |       | 0.05       | 0.26        |         |       | 0.01       | 0.24        |         |       | 0.25       | -0.10       |         |       | ~          | 0.29        |         |       | 0.01       |
|                       | Kyoto 京都         | 0.10        |         |       | 0.01       | 0.29        |         |       | -0.04      | 0.42        |         |       | -0.15      | -0.07       |         |       | -0.08      | 0.12        |         |       | -0.10      |
| 10<br>KANN            | Osaka 大阪         | 0.03        | 0.09    | 0.21  | -0.13      | 0.30        | 0.16    | 0.35  | -0.21      | 0.49        | 0.40    | -0.11 | -0.17      | -0.24       | 0.16    | -0.03 | -0.04      | 0.04        | 0.14    | 0.10  | -0.07      |
|                       | Nara 奈良          | 0.11        | [0.24]  |       | ~          | 0.23        | [-0.17] |       | -0.18      | 0.36        | [0.11]  |       | -0.03      | -0.27       | [-0.13] |       | -0.03      | 0.05        | [0.14]  |       | -0.16      |
|                       | Kobe 神戸          | 0.05        |         |       | -0.14      | 0.19        |         |       | -0.08      | 0.49        |         |       | -0.04      | -0.43       |         |       | -0.13      | 0.03        |         |       | 0.02       |

**Supplementary Table S6-2b.** Spearman CCs using the “box” method, between the time series of annual 99th percentile **daily rainfall** and scores of the Pacific SST modes for the 10 regions defined in Table 1. The CCs are shown using the same colors as Figs 4 and 5. Percentile values were calculated using the “sets” method, where every set of grid-points and timestep is one sample. Under each mode, the 1st sub-column “gauge short” shows CCs calculated from individual gauges for the 2006–2022 period. The 2nd sub-column “radar” shows CCs calculated from radar-AMeDAS for the 2006–2022 short period. The 3rd sub-column “model” shows CCs calculated from d4PDF for the 1952–2010 long period, using the 10-member ensemble mean of extreme values. The 4th sub-column “gauge long” shows CCs calculated from individual gauges for the 1952–2010 period. Cells are shaded according to the criteria of Section 2.2.4. Cells are shaded light dots if criteria S1, S2, or L2 are failed. Cells are shaded with heavy dots if criterion L1 in Section 2.2.4 is fulfilled. Cells are shaded with downward hatches (\\) if criteria S3, S4 or S5 are failed. Cells are shaded with upward hatches (/) if criteria L3, L4 or L5 are failed. Cells are shaded with cross hatches (x) if both downward and upward hatches exist.

| 90th percentile daily |                  |  | mode        |       |       |            |             |       |        |            |             |       |       |            |             |       |       |            |             |       |       |            |       |
|-----------------------|------------------|--|-------------|-------|-------|------------|-------------|-------|--------|------------|-------------|-------|-------|------------|-------------|-------|-------|------------|-------------|-------|-------|------------|-------|
| Sets                  |                  |  | ENSO+       |       |       | ENSO-      |             |       | Trend+ |            |             | PDV   |       |            | ENSO-NC     |       |       |            |             |       |       |            |       |
| region                | station          |  | gauge short | radar | model | gauge long | gauge short | radar | model  | gauge long | gauge short | radar | model | gauge long | gauge short | radar | model | gauge long | gauge short | radar | model | gauge long |       |
| 1<br>KYUS             | Aburatsu 油津      |  | 0.03        |       |       | -0.29      | 0.39        |       |        | 0.06       | 0.08        |       |       | 0.02       | 0.33        |       |       | -0.11      | 0.08        |       |       | -0.02      |       |
|                       | Miyakonojo 都城    |  | -0.25       | -0.19 | -0.14 | -0.11      | 0.45        |       |        | 0.01       | -0.01       |       |       | 0.12       | 0.07        |       |       | -0.25      | -0.11       | 0.01  |       | -0.16      | -0.02 |
|                       | Makurazaki 枕崎    |  | -0.36       |       |       | -0.02      | 0.38        | 0.31  | 0.31   | 0.10       | 0.16        | 0.33  | 0.08  | 0.18       | 0.07        | -0.07 | 0.15  |            | -0.22       | -0.30 |       |            | -0.11 |
|                       | Kagoshima 鹿児島    |  | -0.28       |       |       | -0.10      | 0.52        |       |        | 0.14       | 0.23        |       |       | 0.13       | 0.02        |       |       | -0.24      | -0.04       |       |       |            | -0.07 |
| 2<br>KYUW             | Nagasaki 長崎      |  | 0.49        |       |       | 0.26       | 0.18        |       |        | -0.20      | 0.23        |       |       | 0.11       | 0.04        |       |       | -0.20      | -0.04       |       |       |            | -0.33 |
|                       | Mount Unzen 雲仙岳  |  | 0.33        |       |       | 0.20       | 0.22        |       |        | -0.19      | 0.06        |       |       | 0.15       | -0.12       |       |       | -0.12      | -0.24       |       |       |            | -0.31 |
|                       | Hitoyoshi 人吉     |  | 0.21        | 0.14  | -0.11 | ~          | 0.11        | 0.21  | 0.26   | -0.17      | 0.47        | 0.24  | 0.24  | 0.10       | -0.12       | -0.16 | 0.08  | -0.15      | 0.14        | 0.08  |       | -0.22      | -0.15 |
|                       | Kumamoto 熊本      |  | 0.01        |       |       | 0.11       | 0.03        |       |        | -0.13      | 0.44        |       |       | 0.29       | -0.54       |       |       | -0.16      | -0.10       |       |       |            | -0.22 |
|                       | Akune 阿久根        |  | 0.17        |       |       | -0.01      | 0.25        |       |        | -0.09      | 0.18        |       |       | 0.14       | -0.07       |       |       | -0.13      | -0.03       |       |       |            | -0.17 |
| 3<br>KYUN             | Saga 佐賀          |  | 0.31        |       |       | 0.24       | -0.07       |       |        | -0.22      | 0.09        |       |       | 0.08       | -0.40       |       |       | -0.17      | -0.27       |       |       |            | -0.23 |
|                       | Sasebo 佐世保       |  | 0.22        | 0.02  | -0.16 | 0.27       | 0.16        | 0.11  | 0.27   | -0.08      | 0.15        | 0.26  | 0.15  | 0.07       | -0.43       | -0.54 | 0.02  | -0.05      | -0.11       | -0.11 | -0.33 |            | -0.22 |
|                       | Hirado 平戸        |  | 0.17        |       |       | 0.27       | 0.13        |       |        | -0.19      | 0.23        |       |       | 0.03       | -0.38       |       |       | -0.06      | -0.19       |       |       |            | -0.15 |
|                       | Hita 日田          |  | 0.41        |       |       | 0.26       | 0.09        |       |        | -0.11      | 0.07        |       |       | 0.03       | -0.24       |       |       | -0.08      | -0.23       |       |       |            | -0.07 |
| 4<br>KYUE             | Mount Aso 阿蘇山    |  | 0.34        |       |       | 0.21       | 0.08        |       |        | -0.16      | 0.31        |       |       | 0.22       | -0.18       |       |       | -0.16      | -0.02       |       |       |            | -0.20 |
|                       | Oita 大分          |  | 0.46        | 0.09  | -0.01 | 0.16       | 0.05        | 0.19  | 0.09   | -0.07      | 0.15        | 0.38  | 0.09  | 0.18       | -0.24       | -0.21 | 0.21  | -0.21      | -0.14       | 0.14  | -0.11 |            | -0.08 |
|                       | Miyazaki 宮崎      |  | -0.04       |       |       | -0.04      | 0.23        |       |        | 0.06       | 0.12        |       |       | 0.23       | 0.06        |       |       | -0.19      | 0.37        |       |       |            | 0.01  |
| 5<br>CHUW             | Kure 呉           |  | 0.10        |       |       | 0.13       | 0.30        |       |        | -0.19      | 0.23        |       |       | 0.10       | -0.36       |       |       | -0.09      | 0.43        |       |       |            | -0.19 |
|                       | Hiroshima 広島     |  | 0.14        | 0.39  | -0.07 | 0.12       | 0.35        | 0.29  | 0.26   | -0.04      | 0.24        | -0.04 | ~     | 0.03       | -0.20       | -0.08 | 0.07  | -0.10      | 0.24        | 0.20  | -0.23 |            | -0.10 |
|                       | Shimonoseki 下関   |  | 0.22        |       |       | 0.17       | 0.09        |       |        | -0.03      | -0.05       |       |       | 0.06       | -0.46       |       |       | -0.07      | 0.15        |       |       |            | -0.04 |
|                       | Hagi 萩           |  | 0.31        |       |       | 0.19       | 0.40        |       |        | -0.16      | 0.08        |       |       | 0.01       | -0.39       |       |       | -0.07      | 0.34        |       |       |            | -0.16 |
| 6<br>CHUN             | Sakai 堺          |  | -0.20       |       |       | 0.17       | 0.19        |       |        | 0.01       | 0.44        |       |       | -0.10      | -0.10       |       |       | -0.02      | 0.23        |       |       |            | -0.10 |
|                       | Yonago 米子        |  | -0.27       | -0.14 | 0.18  | 0.14       | -0.01       | -0.10 | 0.24   | -0.04      | 0.36        | 0.01  | -0.12 | -0.08      | -0.22       | -0.29 | -0.07 | -0.05      | 0.23        | 0.16  | -0.09 |            | -0.15 |
|                       | Tottori 鳥取       |  | -0.04       |       |       | 0.01       | 0.19        |       |        | -0.12      | 0.38        |       |       | ~          | -0.01       | -0.29 |       | -0.03      | 0.10        |       |       |            | -0.18 |
|                       | Matsue 松江        |  | -0.16       |       |       | 0.08       | -0.04       |       |        | 0.02       | 0.06        |       |       | -0.10      | -0.03       |       |       | ~          | 0.31        |       |       |            | -0.04 |
| 7<br>CHUS             | Himeji 姫路        |  | 0.01        |       |       | -0.18      | 0.30        |       |        | -0.03      | 0.59        |       |       | -0.07      | -0.26       |       |       | -0.10      | 0.34        |       |       |            | 0.06  |
|                       | Okayama 岡山       |  | 0.03        |       |       | 0.08       | 0.33        |       |        | -0.03      | 0.33        |       |       | 0.14       | -0.44       |       |       | -0.15      | 0.21        |       |       |            | ~     |
|                       | Fukuyama 福山      |  | -0.15       | -0.05 | 0.16  | 0.07       | 0.50        | 0.30  | 0.10   | -0.10      | 0.23        | 0.28  | -0.10 | 0.09       | -0.49       | -0.12 | 0.19  | -0.18      | 0.23        | 0.40  | 0.03  |            | -0.10 |
|                       | Takamatsu 高松     |  | 0.11        |       |       | 0.07       | 0.22        |       |        | -0.14      | 0.32        |       |       | 0.06       | -0.19       |       |       | -0.05      | 0.01        |       |       |            | 0.07  |
|                       | Ushibuka 牛深      |  | 0.19        |       |       | 0.11       | 0.07        |       |        | -0.19      | 0.07        |       |       | 0.16       | -0.04       |       |       | -0.13      | -0.19       |       |       |            | -0.23 |
| 8<br>SHIP             | Murotomisaki 室戸岬 |  | -0.35       | 0.17  | -0.09 | -0.10      | 0.63        | 0.06  | ~      | -0.09      | 0.28        | 0.68  | 0.08  | 0.15       | -0.03       | 0.03  | 0.07  | -0.24      | 0.16        | 0.19  | 0.06  |            | -0.14 |
|                       | Kochi 高知         |  | 0.15        |       |       | 0.04       | 0.25        |       |        | 0.03       | 0.50        |       |       | 0.10       | 0.12        | 0.03  | 0.07  | -0.24      | 0.18        |       |       |            | -0.14 |
| 9<br>KANS             | Owase 尾鷲         |  | 0.05        |       |       | -0.12      | 0.19        |       |        | -0.03      | 0.28        |       |       | 0.03       | 0.07        |       |       | -0.06      | -0.16       |       |       |            | 0.03  |
|                       | Wakayama 和歌山     |  | 0.06        | 0.21  | 0.04  | -0.14      | 0.22        | 0.23  | 0.06   | -0.08      | 0.49        | 0.49  | 0.04  | 0.08       | -0.40       | -0.08 | 0.03  | -0.15      | -0.08       | 0.44  | -0.01 |            | 0.03  |
|                       | Shionomisaki 潮岬  |  | -0.09       |       |       | 0.05       | 0.26        |       |        | 0.01       | 0.24        |       |       | 0.25       | -0.10       |       |       | ~          | 0.29        |       |       |            | 0.01  |
| 10<br>KANN            | Kyoto 京都         |  | 0.10        |       |       | 0.01       | 0.29        |       |        | -0.04      | 0.42        |       |       | -0.15      | -0.07       |       |       | -0.08      | 0.12        |       |       |            | -0.10 |
|                       | Osaka 大阪         |  | 0.03        | -0.18 | -0.02 | -0.13      | 0.30        | -0.16 | 0.09   | -0.21      | 0.49        | 0.38  | -0.26 | ~          | -0.17       | -0.33 | 0.08  | -0.04      | 0.04        | 0.07  | 0.03  |            | -0.07 |
|                       | Nara 奈良          |  | 0.11        |       |       | ~          | 0.23        |       |        | -0.18      | 0.36        |       |       | -0.03      | -0.27       |       |       | -0.03      | 0.05        |       |       |            | -0.16 |
|                       | Kobe 神戸          |  | 0.05        |       |       | -0.14      | 0.19        |       |        | -0.08      | 0.49        |       |       | -0.04      | -0.43       |       |       | -0.13      | 0.03        |       |       |            | 0.02  |



## Supplementary Material Section 7

**Supplementary Table S7.1a.** Strength of Spearman CCs between rainfall extremes in the 10 analysis regions (rows) and indices describing the monsoon front (columns). The CCs are shown using the same colors as Figs 4 and 5. The indices are for monsoon jet zonal water vapour flux anomaly  $\mu_{JQU}$ , monsoon jet meridional water vapour flux anomaly  $\mu_{JQV}$ , and monsoon jet water vapour flux variance  $\sigma_{JQ(U,V)}$ . For each index, sub-columns are for seasonal 99th percentile hourly rainfall and 90th percentile daily rainfall. For each time resolution, CCs are shown for both the short-period (SO) of 2006–2022 and the long-period (LO) of 2058–2010. Bold font indicates statistical significance at  $\alpha=0.05$ .

|            |              |     | West (125-130 °E) |       |      |       |            |       |      |       |                 |       |       |       |      |
|------------|--------------|-----|-------------------|-------|------|-------|------------|-------|------|-------|-----------------|-------|-------|-------|------|
|            |              |     | QU anomaly        |       |      |       | QV anomaly |       |      |       | Q(U,V) variance |       |       |       |      |
|            |              |     | hour              |       | day  |       | hour       |       | day  |       | hour            |       | day   |       |      |
| region     | station      |     | SO                | LO    | SO   | LO    | SO         | LO    | SO   | LO    | SO              | LO    | SO    | LO    |      |
| 1<br>KYUS  | Aburatsu     | 油津  | 0.65              | 0.41  | 0.40 | 0.48  | 0.31       | -0.07 | 0.43 | 0.05  | -0.35           | -0.37 | -0.19 | -0.41 |      |
|            | Miyakonojo   | 都城  |                   | 0.43  |      | 0.45  |            | -0.06 |      | 0.03  |                 | -0.22 |       | -0.24 |      |
|            | Makurazaki   | 枕崎  |                   | 0.53  |      | 0.51  |            | -0.04 |      | 0.13  |                 | -0.37 |       | -0.38 |      |
|            | Kagoshima    | 鹿児島 |                   | 0.52  |      | 0.58  |            | -0.04 |      | 0.14  |                 | -0.39 |       | -0.30 |      |
| 2<br>KYUW  | Nagasaki     | 長崎  | 0.12              | 0.13  | 0.20 | 0.26  | 0.67       | 0.09  | 0.70 | 0.16  | -0.02           | -0.04 | -0.04 | -0.12 |      |
|            | Mount Unzen  | 雲仙岳 |                   | 0.22  |      | 0.21  |            | -0.05 |      | 0.08  |                 | -0.02 |       | -0.03 |      |
|            | Hitoyoshi    | 人吉  |                   | 0.38  |      | 0.48  |            | 0.08  |      | 0.10  |                 | -0.24 |       | -0.31 |      |
|            | Kumamoto     | 熊本  |                   | 0.24  |      | 0.37  |            | 0.16  |      | 0.08  |                 | -0.13 |       | -0.21 |      |
|            | Akune        | 阿久根 |                   | 0.28  |      | 0.36  |            | 0.03  |      | 0.05  |                 | -0.22 |       | -0.24 |      |
| 3<br>KYUN  | Saga         | 佐賀  | 0.24              | 0.21  | 0.13 | 0.15  | 0.48       | 0.19  | 0.74 | 0.20  | -0.10           | -0.12 | 0.09  | -0.06 |      |
|            | Sasebo       | 佐世保 |                   | 0.03  |      | 0.20  |            | 0.23  |      | 0.29  |                 | 0.00  |       | -0.12 |      |
|            | Hirado       | 平戸  |                   | 0.07  |      | 0.11  |            | 0.08  |      | 0.21  |                 | -0.01 |       | -0.03 |      |
|            | Hita         | 日田  |                   | 0.16  |      | 0.26  |            | 0.13  |      | 0.08  |                 | -0.10 |       | -0.13 |      |
| 4<br>KYUE  | Mount Aso    | 阿蘇山 | 0.15              | 0.21  | 0.05 | 0.35  | 0.33       | 0.06  | 0.59 | 0.11  | -0.07           | -0.02 | 0.15  | -0.04 |      |
|            | Oita         | 大分  |                   | 0.21  |      | 0.14  |            | 0.20  |      | 0.17  |                 | -0.15 |       | -0.14 |      |
|            | Miyazaki     | 宮崎  |                   | 0.28  |      | 0.47  |            | -0.14 |      | -0.06 |                 | -0.24 |       | -0.33 |      |
| 5<br>CHUW  | Kure         | 呉   | 0.08              | 0.08  | 0.01 | 0.23  | 0.45       | 0.33  | 0.58 | 0.21  | 0.04            | 0.04  | 0.12  | 0.00  |      |
|            | Hiroshima    | 広島  |                   | 0.16  |      | 0.32  |            | 0.43  |      | 0.35  |                 | -0.09 |       | -0.10 |      |
|            | Shimonoseki  | 下関  |                   | 0.33  |      | 0.31  |            | 0.37  |      | 0.32  |                 | -0.10 |       | -0.15 |      |
|            | Hagi         | 萩   |                   | 0.13  |      | 0.13  |            | 0.36  |      | 0.30  |                 | -0.01 |       | 0.10  |      |
| 6<br>CHUN  | Sakai        | 堺   | -0.13             | -0.03 | 0.14 | 0.03  | -0.02      | 0.15  | 0.31 | 0.14  | 0.10            | 0.21  | 0.08  | 0.20  |      |
|            | Yonago       | 米子  |                   | 0.02  |      | 0.10  |            | 0.27  |      | 0.26  |                 | 0.15  |       | 0.08  |      |
|            | Tottori      | 鳥取  |                   | 0.08  |      | 0.14  |            | 0.08  |      | 0.21  |                 | 0.10  |       | 0.06  |      |
|            | Matsue       | 松江  |                   | 0.05  |      | 0.09  |            | 0.21  |      | 0.21  |                 | 0.22  |       | 0.14  |      |
| 7<br>CHUS  | Himeji       | 姫路  | 0.01              | 0.13  | 0.20 | 0.20  | 0.22       | -0.04 | 0.61 | -0.06 | 0.13            | 0.05  | 0.06  | 0.01  |      |
|            | Okayama      | 岡山  |                   | -0.01 |      | 0.15  |            | 0.17  |      | 0.17  |                 | 0.16  |       | 0.03  |      |
|            | Fukuyama     | 福山  |                   | -0.06 |      | 0.16  |            | 0.16  |      | 0.33  |                 | 0.19  |       | 0.14  | 0.07 |
|            | Takamatsu    | 高松  |                   | 0.12  |      | -0.06 |            | 0.05  |      | 0.07  |                 | 0.08  |       | 0.25  |      |
|            | Ushibuka     | 牛深  |                   | 0.28  |      | 0.32  |            | 0.11  |      | 0.08  |                 | -0.12 |       | -0.14 |      |
| 8<br>SHIP  | Murotomisaki | 室戸岬 | 0.27              | 0.18  | 0.16 | 0.42  | 0.37       | -0.22 | 0.53 | -0.07 | 0.09            | 0.22  | 0.22  | -0.18 |      |
|            | Kochi        | 高知  |                   | 0.03  |      | 0.11  |            | -0.06 |      | 0.05  |                 | -0.04 |       | -0.08 |      |
| 9<br>KANS  | Owase        | 尾鷲  | 0.38              | 0.14  | 0.37 | 0.15  | 0.51       | -0.32 | 0.51 | -0.06 | 0.02            | -0.06 | -0.10 | -0.18 |      |
|            | Wakayama     | 和歌山 |                   | 0.20  |      | 0.32  |            | -0.09 |      | -0.06 |                 | -0.10 |       | -0.22 |      |
|            | Shionomisaki | 潮岬  |                   | 0.33  |      | 0.39  |            | -0.17 |      | -0.13 |                 | -0.12 |       | -0.19 |      |
| 10<br>KANN | Kyoto        | 京都  | 0.03              | 0.15  | 0.10 | 0.17  | 0.30       | 0.09  | 0.50 | -0.06 | 0.16            | 0.04  | 0.12  | 0.04  |      |
|            | Osaka        | 大阪  |                   | 0.26  |      | 0.14  |            | 0.01  |      | -0.05 |                 | -0.20 |       | -0.11 |      |
|            | Nara         | 奈良  |                   | 0.24  |      | 0.25  |            | -0.09 |      | -0.12 |                 | -0.04 |       | -0.09 |      |
|            | Kobe         | 神戸  |                   | 0.19  |      | 0.23  |            | -0.06 |      | 0.05  |                 | -0.14 |       | -0.13 |      |

**Supplementary Table S7.1b.** Strength of Spearman CCs between rainfall extremes in the 10 analysis regions (rows) and indices describing the monsoon front (columns). The CCs are shown using the same colors as Figs 4 and 5. The columns are monsoon jet latitude anomaly  $\mu_{JLat}$ , monsoon jet latitude variance  $\sigma_{JLat}$ , monsoon front latitude anomaly  $\mu_{FLat}$ , and monsoon front latitude variance  $\sigma_{FLat}$ . For each index, sub-columns are for seasonal 99th percentile hourly rainfall and 90th percentile daily rainfall. For each time resolution, CCs are shown for both the short-period (SO) of 2006–2022 and the long-period (LO) of 2058–2010. Bold font indicates statistical significance at  $\alpha=0.05$ .

|            |                  | East (130-135 °E)              |              |       |       |          |              |     |              |                |       |     |              |          |              |     |       |
|------------|------------------|--------------------------------|--------------|-------|-------|----------|--------------|-----|--------------|----------------|-------|-----|--------------|----------|--------------|-----|-------|
|            |                  | water vapour flux jet latitude |              |       |       |          |              |     |              | front latitude |       |     |              |          |              |     |       |
|            |                  | anomaly                        |              |       |       | variance |              |     |              | anomaly        |       |     |              | variance |              |     |       |
|            |                  | hour                           |              | day   |       | hour     |              | day |              | hour           |       | day |              | hour     |              | day |       |
| region     | station          | SO                             | LO           | SO    | LO    | SO       | LO           | SO  | LO           | SO             | LO    | SO  | LO           | SO       | LO           | SO  | LO    |
| 1<br>KYUS  | Aburatsu 油津      |                                | -0.06        |       | -0.05 |          | -0.20        |     | <b>-0.33</b> |                | -0.23 |     | -0.19        |          | -0.04        |     | 0.03  |
|            | Miyakonojo 都城    |                                | -0.12        |       | -0.14 |          | -0.25        |     | <b>-0.38</b> |                | -0.24 |     | -0.23        |          | 0.07         |     | -0.04 |
|            | Makurazaki 枕崎    | <b>0.05</b>                    | -0.06        |       | -0.19 |          | -0.26        |     | -0.21        |                | -0.44 |     | <b>-0.27</b> |          | -0.12        |     | -0.08 |
|            | Kagoshima 鹿児島    |                                | -0.13        |       | -0.06 |          | <b>-0.28</b> |     | <b>-0.36</b> |                | -0.17 |     | -0.26        |          | -0.08        |     | -0.02 |
| 2<br>KYUW  | Nagasaki 長崎      |                                | -0.20        |       | -0.18 |          | -0.14        |     | -0.17        |                | -0.04 |     | -0.09        |          | -0.16        |     | -0.12 |
|            | Mount Unzen 雲仙岳  |                                | <b>-0.28</b> |       | -0.22 |          | -0.24        |     | -0.14        |                | -0.19 |     | -0.12        |          | -0.03        |     | -0.02 |
|            | Hitoyoshi 人吉     | -0.15                          | 0.05         | -0.10 | -0.02 |          | -0.26        |     | <b>-0.29</b> |                | -0.46 |     | <b>-0.38</b> |          | 0.27         |     | -0.11 |
|            | Kumamoto 熊本      |                                | -0.09        |       | -0.13 |          | <b>-0.27</b> |     | <b>-0.30</b> |                | -0.03 |     | -0.07        |          | -0.38        |     | -0.10 |
|            | Akune 阿久根        |                                | 0.06         |       | -0.12 |          | ~            |     | -0.23        |                | -0.04 |     | -0.15        |          | -0.10        |     | -0.14 |
| 3<br>KYUN  | Saga 佐賀          |                                | -0.06        |       | -0.07 |          | -0.19        |     | -0.19        |                | -0.05 |     | 0.02         |          | -0.07        |     | -0.08 |
|            | Sasebo 佐世保       |                                | 0.02         |       | 0.03  |          | -0.07        |     | -0.22        |                | -0.13 |     | -0.13        |          | ~            |     | 0.02  |
|            | Hirado 平戸        | <b>0.13</b>                    | 0.04         | 0.11  | ~     |          | -0.10        |     | -0.15        |                | -0.38 |     | -0.11        |          | 0.05         |     | -0.10 |
|            | Hita 日田          |                                | -0.04        |       | -0.08 |          | -0.19        |     | <b>-0.35</b> |                | 0.03  |     | -0.14        |          | -0.35        |     | 0.05  |
| 4<br>KYUE  | Mount Aso 阿蘇山    |                                | -0.13        |       | -0.17 |          | ~            |     | <b>-0.27</b> |                | -0.31 |     | -0.01        |          | -0.16        |     | -0.10 |
|            | Oita 大分          | -0.20                          | -0.14        | -0.30 | -0.11 |          | ~            |     | -0.22        |                | -0.32 |     | -0.21        |          | ~            |     | -0.06 |
|            | Miyazaki 宮崎      |                                | 0.05         |       | -0.07 |          | -0.08        |     | <b>-0.30</b> |                | -0.14 |     | -0.22        |          | 0.21         |     | -0.02 |
| 5<br>CHUW  | Kure 呉           |                                | -0.05        |       | -0.13 |          | <b>-0.29</b> |     | <b>-0.28</b> |                | ~     |     | -0.10        |          | -0.02        |     | 0.02  |
|            | Hiroshima 広島     |                                | 0.04         |       | -0.04 |          | -0.31        |     | <b>-0.38</b> |                | -0.28 |     | -0.17        |          | 0.05         |     | -0.11 |
|            | Shimonoseki 下関   | <b>0.24</b>                    | <b>0.20</b>  | 0.02  | 0.13  |          | -0.31        |     | <b>-0.30</b> |                | -0.28 |     | -0.17        |          | -0.05        |     | -0.10 |
|            | Hagi 萩           |                                | 0.17         |       | 0.09  |          | -0.12        |     | -0.10        |                | -0.10 |     | -0.06        |          | 0.01         |     | -0.06 |
| 6<br>CHUN  | Sakai 堺          |                                | -0.05        |       | -0.10 |          | -0.09        |     | -0.19        |                | 0.13  |     | 0.06         |          | -0.11        |     | -0.01 |
|            | Yonago 米子        |                                | -0.02        |       | 0.01  |          | -0.17        |     | -0.19        |                | 0.17  |     | 0.09         |          | -0.19        |     | -0.07 |
|            | Tottori 鳥取       | 0.04                           | -0.16        | 0.04  | 0.07  |          | -0.04        |     | -0.17        |                | -0.42 |     | -0.10        |          | 0.11         |     | -0.04 |
|            | Matsue 松江        |                                | -0.12        |       | -0.02 |          | -0.16        |     | -0.23        |                | 0.11  |     | 0.10         |          | -0.20        |     | -0.05 |
| 7<br>CHUS  | Himeji 姫路        |                                | -0.07        |       | 0.04  |          | -0.19        |     | <b>-0.28</b> |                | 0.05  |     | 0.09         |          | -0.24        |     | -0.07 |
|            | Okayama 岡山       |                                | 0.02         |       | ~     |          | -0.23        |     | <b>-0.30</b> |                | 0.17  |     | 0.11         |          | -0.13        |     | -0.12 |
|            | Fukuyama 福山      | <b>0.24</b>                    | 0.05         | 0.10  | 0.05  |          | -0.12        |     | -0.14        |                | -0.37 |     | -0.21        |          | 0.27         |     | 0.11  |
|            | Takamatsu 高松     |                                | -0.02        |       | 0.08  |          | -0.19        |     | -0.17        |                | 0.24  |     | <b>0.36</b>  |          | -0.18        |     | -0.10 |
|            | Ushibuka 牛深      |                                | -0.07        |       | -0.07 |          | -0.04        |     | -0.13        |                | -0.04 |     | -0.10        |          | -0.25        |     | -0.02 |
| 8<br>SHIP  | Murotomisaki 室戸岬 |                                | -0.06        |       | -0.09 |          | -0.05        |     | -0.22        |                | 0.14  |     | 0.02         |          | 0.16         |     | -0.07 |
|            | Kochi 高知         | <b>0.13</b>                    | 0.16         | -0.40 | 0.10  |          | -0.13        |     | -0.07        |                | -0.38 |     | -0.18        |          | 0.14         |     | 0.14  |
| 9<br>KANS  | Owase 尾鷲         |                                | 0.04         |       | 0.04  |          | 0.01         |     | -0.05        |                | ~     |     | -0.03        |          | 0.09         |     | 0.10  |
|            | Wakayama 和歌山     | 0.16                           | 0.08         | 0.07  | -0.09 |          | -0.41        |     | -0.23        |                | -0.50 |     | <b>-0.38</b> |          | 0.29         |     | 0.10  |
|            | Shionomisaki 潮岬  |                                | -0.05        |       | -0.17 |          | <b>-0.27</b> |     | <b>-0.35</b> |                | -0.27 |     | -0.25        |          | -0.22        |     | -0.15 |
| 10<br>KANN | Kyoto 京都         |                                | -0.09        |       | -0.13 |          | -0.32        |     | <b>-0.27</b> |                | 0.03  |     | 0.05         |          | 0.03         |     | 0.03  |
|            | Osaka 大阪         |                                | 0.02         |       | -0.03 |          | -0.35        |     | <b>-0.45</b> |                | -0.32 |     | -0.31        |          | 0.26         |     | 0.01  |
|            | Nara 奈良          | <b>0.08</b>                    | -0.10        | -0.12 | -0.03 |          | -0.39        |     | <b>-0.34</b> |                | -0.02 |     | 0.27         |          | 0.04         |     | 0.24  |
|            | Kobe 神戸          |                                | 0.16         |       | 0.07  |          | <b>-0.33</b> |     | <b>-0.30</b> |                | 0.07  |     | 0.17         |          | <b>-0.62</b> |     | 0.03  |

**Supplementary Table S7.2.** Strength of Spearman CCs between rainfall extremes in the 10 analysis regions (rows) and indices describing the monsoon front (columns). The CCs are shown using the same colors as Figs 4 and 5. The CCs are shown using the same colors as Figs 4 and 5. The columns are for monsoon jet zonal water vapour flux anomaly  $\mu_{JQU}$ , monsoon jet meridional water vapour flux anomaly  $\mu_{JQV}$ , monsoon jet water vapour flux variance  $\sigma_{JQ(U,V)}$ , monsoon jet latitude anomaly  $\mu_{JLat}$ , monsoon jet latitude variance  $\sigma_{JLat}$ , monsoon front latitude anomaly  $\mu_{FLat}$ , and monsoon front latitude variance  $\sigma_{FLat}$ . For each region, sub-rows are for seasonal 99th percentile hourly rainfall and 90th percentile daily rainfall. For each index, sub-columns show CCs from radar-AMeDas over the 2006–2022 period, and from d4PDF for the 2058–2010 period. Bold font indicates statistical significance at  $\alpha=0.05$ .

|            |        | West (125-130)   |             |             |             |          |             | East (130-135)            |              |              |              |                |              |              |              |
|------------|--------|------------------|-------------|-------------|-------------|----------|-------------|---------------------------|--------------|--------------|--------------|----------------|--------------|--------------|--------------|
|            |        | water vapour jet |             |             |             |          |             | water vapour jet latitude |              |              |              | front latitude |              |              |              |
|            |        | QU anomaly       |             | QV anomaly  |             | variance |             | anomaly                   |              | variance     |              | anomaly        |              | variance     |              |
| region     | rain   | radar            | d4PDF       | radar       | d4PDF       | radar    | d4PDF       | radar                     | d4PDF        | radar        | d4PDF        | radar          | d4PDF        | radar        | d4PDF        |
| 1<br>KYUS  | hourly | <b>0.65</b>      | <b>0.38</b> | 0.31        | <b>0.35</b> | -0.35    | 0.10        | -0.05                     | <b>-0.40</b> | -0.26        | <b>-0.61</b> | -0.12          | <b>-0.35</b> | -0.33        | <b>-0.33</b> |
|            | daily  | 0.40             | <b>0.40</b> | 0.43        | <b>0.39</b> | -0.19    | 0.04        | -0.19                     | <b>-0.34</b> | -0.44        | <b>-0.64</b> | 0.01           | <b>-0.28</b> | -0.27        | <b>-0.32</b> |
| 2<br>KYUW  | hourly | 0.12             | <b>0.40</b> | <b>0.67</b> | <b>0.51</b> | -0.02    | 0.15        | -0.15                     | <b>-0.26</b> | -0.26        | <b>-0.63</b> | 0.27           | -0.13        | -0.38        | -0.23        |
|            | daily  | 0.20             | <b>0.52</b> | <b>0.70</b> | <b>0.56</b> | -0.04    | 0.07        | -0.10                     | -0.19        | <b>-0.46</b> | <b>-0.69</b> | 0.29           | -0.10        | -0.22        | -0.22        |
| 3<br>KYUN  | hourly | 0.24             | <b>0.55</b> | <b>0.48</b> | <b>0.61</b> | -0.10    | 0.02        | 0.13                      | -0.10        | -0.10        | <b>-0.73</b> | 0.05           | -0.05        | -0.35        | -0.20        |
|            | daily  | 0.13             | <b>0.59</b> | <b>0.74</b> | <b>0.64</b> | -0.09    | -0.05       | 0.11                      | 0.01         | <b>-0.38</b> | <b>-0.68</b> | 0.30           | ~            | -0.27        | -0.18        |
| 4<br>KYUE  | hourly | 0.15             | 0.03        | 0.33        | 0.13        | -0.07    | <b>0.45</b> | -0.20                     | <b>-0.52</b> | ~            | <b>-0.42</b> | ~              | -0.19        | -0.13        | <b>-0.28</b> |
|            | daily  | 0.05             | 0.06        | <b>0.59</b> | 0.24        | 0.15     | <b>0.40</b> | -0.30                     | <b>-0.45</b> | -0.32        | <b>-0.43</b> | 0.21           | -0.13        | -0.04        | <b>-0.27</b> |
| 5<br>CHUW  | hourly | 0.08             | <b>0.41</b> | 0.45        | <b>0.37</b> | ~        | 0.11        | 0.24                      | -0.19        | -0.31        | <b>-0.64</b> | 0.05           | -0.10        | -0.15        | -0.20        |
|            | daily  | 0.01             | <b>0.52</b> | <b>0.58</b> | <b>0.46</b> | 0.12     | -0.01       | 0.02                      | -0.12        | -0.28        | <b>-0.72</b> | -0.03          | -0.02        | -0.37        | -0.20        |
| 6<br>CHUN  | hourly | -0.13            | 0.20        | -0.02       | 0.05        | 0.10     | 0.39        | 0.04                      | <b>-0.49</b> | -0.04        | <b>-0.47</b> | 0.11           | -0.25        | -0.20        | 0.05         |
|            | daily  | 0.14             | <b>0.34</b> | 0.31        | <b>0.31</b> | 0.08     | 0.12        | 0.04                      | -0.18        | <b>-0.42</b> | <b>-0.50</b> | -0.15          | -0.04        | <b>-0.40</b> | 0.02         |
| 7<br>CHUS  | hourly | 0.01             | 0.21        | 0.22        | 0.08        | 0.13     | <b>0.36</b> | 0.24                      | <b>-0.45</b> | -0.12        | <b>-0.40</b> | 0.27           | -0.22        | -0.18        | -0.01        |
|            | daily  | 0.20             | <b>0.33</b> | <b>0.61</b> | <b>0.35</b> | 0.06     | 0.15        | 0.10                      | <b>-0.28</b> | -0.37        | <b>-0.56</b> | 0.23           | -0.05        | <b>-0.41</b> | -0.11        |
| 8<br>SHIP  | hourly | 0.27             | 0.04        | 0.37        | 0.05        | ~        | 0.24        | -0.13                     | <b>-0.42</b> | -0.13        | <b>-0.37</b> | 0.14           | -0.13        | -0.04        | -0.19        |
|            | daily  | 0.16             | 0.08        | <b>0.53</b> | 0.23        | 0.22     | 0.24        | <b>-0.40</b>              | <b>-0.37</b> | -0.38        | <b>-0.47</b> | 0.10           | 0.01         | 0.02         | <b>-0.25</b> |
| 9<br>KANS  | hourly | 0.38             | 0.08        | <b>0.51</b> | 0.17        | 0.02     | 0.14        | 0.16                      | <b>-0.41</b> | -0.41        | <b>-0.43</b> | 0.29           | -0.18        | -0.22        | <b>-0.24</b> |
|            | daily  | 0.37             | 0.19        | <b>0.51</b> | <b>0.28</b> | -0.03    | 0.15        | 0.07                      | <b>-0.38</b> | <b>-0.50</b> | <b>-0.52</b> | 0.23           | -0.18        | -0.30        | -0.19        |
| 10<br>KANN | hourly | 0.03             | 0.13        | 0.30        | 0.13        | 0.16     | <b>0.29</b> | -0.08                     | <b>-0.44</b> | -0.35        | <b>-0.41</b> | 0.26           | -0.20        | <b>-0.62</b> | 0.02         |
|            | daily  | 0.10             | 0.22        | <b>0.50</b> | <b>0.32</b> | 0.12     | 0.16        | -0.12                     | <b>-0.28</b> | -0.32        | <b>-0.47</b> | 0.27           | -0.12        | <b>-0.43</b> | -0.05        |

**Supplementary Table S7.3a.** Strength of Spearman CCs from **JRA55**, between indices describing the monsoon front (rows) and the scores of 5 Pacific SST modes (columns), using different datasets and time periods. The CCs are shown using the same colors as Figs 4 and 5. The rows are for monsoon jet zonal water vapour flux anomaly  $\mu_{JQU}$ , monsoon jet meridional water vapour flux anomaly  $\mu_{JQV}$ , monsoon jet water vapour flux variance  $\sigma_{JQ(U,V)}$ , monsoon jet latitude anomaly  $\mu_{JLat}$ , monsoon jet latitude variance  $\sigma_{JLat}$ , monsoon front latitude anomaly  $\mu_{FLat}$ , and monsoon front latitude variance  $\sigma_{FLat}$ . Bold font indicates statistical significance at  $\alpha=0.05$ .

| JRA55                       |                              |             | ENSO+        |              | ENSO-        |              | Trend+      |             | PDV          |             |
|-----------------------------|------------------------------|-------------|--------------|--------------|--------------|--------------|-------------|-------------|--------------|-------------|
|                             |                              |             | 1958-2022    | 1958-2010    | 1958-2022    | 1958-2010    | 1958-2022   | 1958-2010   | 1958-2022    | 1958-2010   |
| West<br>125–130 °E          | front lat                    | anomaly     | -0.15        | -0.14        | -0.17        | -0.18        | 0.04        | -0.09       | 0.06         | 0.04        |
|                             |                              | variance    | -0.08        | -0.05        | -0.18        | -0.15        | 0.17        | <b>0.21</b> | 0.05         | 0.12        |
|                             | water vapour<br>flux jet lat | anomaly     | <b>-0.29</b> | <b>-0.20</b> | 0.03         | 0.08         | -0.11       | -0.16       | 0.15         | 0.14        |
|                             |                              | variance    | 0.14         | 0.15         | -0.13        | -0.07        | -0.12       | -0.09       | 0.08         | <b>0.21</b> |
|                             | water vapour<br>flux jet QU  | anomaly     | <b>-0.22</b> | <b>-0.20</b> | <b>0.36</b>  | <b>0.31</b>  | 0.18        | 0.12        | 0.01         | -0.13       |
|                             |                              | variance    | <b>0.38</b>  | <b>0.31</b>  | <b>-0.32</b> | <b>-0.32</b> | -0.07       | -0.08       | -0.07        | -0.05       |
| water vapour<br>flux jet QV | anomaly                      | 0.08        | 0.05         | 0.07         | 0.03         | <b>0.25</b>  | 0.17        | -0.16       | <b>-0.27</b> |             |
|                             | variance                     | <b>0.24</b> | 0.18         | -0.19        | -0.17        | -0.02        | ~           | -0.09       | -0.09        |             |
| water vapour<br>flux jet    | variance                     | <b>0.37</b> | <b>0.30</b>  | <b>-0.32</b> | <b>-0.32</b> | -0.06        | -0.07       | -0.06       | -0.02        |             |
| East<br>130–135 °E          | front lat                    | anomaly     | -0.11        | -0.15        | -0.18        | <b>-0.24</b> | ~           | -0.08       | -0.09        | -0.17       |
|                             |                              | variance    | 0.11         | 0.14         | -0.02        | 0.06         | <b>0.22</b> | <b>0.21</b> | 0.03         | 0.04        |
|                             | water vapour<br>flux jet lat | anomaly     | -0.19        | -0.15        | 0.19         | 0.17         | -0.14       | -0.12       | -0.03        | 0.01        |
|                             |                              | anomaly     | 0.06         | 0.13         | -0.16        | -0.10        | -0.09       | -0.03       | -0.04        | 0.05        |
|                             | water vapour<br>flux jet QU  | variance    | <b>-0.23</b> | <b>-0.20</b> | <b>0.45</b>  | <b>0.44</b>  | 0.17        | 0.14        | -0.01        | -0.10       |
|                             |                              | edddvar     | <b>0.40</b>  | <b>0.36</b>  | <b>-0.33</b> | <b>-0.35</b> | -0.05       | -0.03       | 0.01         | 0.04        |
| water vapour<br>flux jet    | edddvar                      | <b>0.39</b> | <b>0.32</b>  | <b>-0.33</b> | <b>-0.35</b> | -0.03        | ~           | -0.02       | 0.01         |             |

**Supplementary Table S7.3b.** Strength of Spearman CCs from **d4PDF**, between indices describing the monsoon front (rows) and the scores of 5 Pacific SST modes (columns), using different datasets and time periods. The CCs are shown using the same colors as Figs 4 and 5. The rows are for monsoon jet zonal water vapour flux anomaly  $\mu_{JQU}$ , monsoon jet meridional water vapour flux anomaly  $\mu_{JQV}$ , monsoon jet water vapour flux variance  $\sigma_{JQ(U,V)}$ , monsoon jet latitude anomaly  $\mu_{JLat}$ , monsoon jet latitude variance  $\sigma_{JLat}$ , monsoon front latitude anomaly  $\mu_{FLat}$ , and monsoon front latitude variance  $\sigma_{FLat}$ . Bold font indicates statistical significance at  $\alpha=0.05$ .

| d4PDF                       |                              |              | ENSO+        |              | ENSO-        |              | Trend+    |           | PDV       |           |
|-----------------------------|------------------------------|--------------|--------------|--------------|--------------|--------------|-----------|-----------|-----------|-----------|
|                             |                              |              | 1958-2010    | 1952-2010    | 1958-2010    | 1952-2010    | 1958-2010 | 1952-2010 | 1958-2010 | 1952-2010 |
| West<br>125–130 °E          | front lat                    | anomaly      | <b>-0.37</b> | <b>-0.41</b> | <b>-0.27</b> | <b>-0.30</b> | -0.10     | -0.05     | 0.01      | -0.05     |
|                             |                              | variance     | 0.12         | 0.08         | ~            | 0.01         | -0.12     | -0.08     | -0.01     | 0.03      |
|                             | water vapour<br>flux jet lat | anomaly      | <b>-0.30</b> | <b>-0.34</b> | <b>-0.29</b> | <b>-0.31</b> | -0.09     | -0.06     | -0.04     | -0.07     |
|                             |                              | variance     | -0.04        | -0.08        | <b>-0.32</b> | <b>-0.28</b> | -0.05     | 0.02      | 0.10      | 0.08      |
|                             | water vapour<br>flux jet QU  | anomaly      | -0.08        | ~            | <b>0.47</b>  | <b>0.47</b>  | 0.05      | 0.07      | -0.18     | -0.18     |
|                             |                              | variance     | 0.19         | 0.16         | -0.05        | ~            | 0.16      | 0.14      | 0.14      | 0.17      |
| water vapour<br>flux jet QV | anomaly                      | <b>-0.28</b> | <b>-0.26</b> | <b>0.30</b>  | <b>0.27</b>  | 0.13         | 0.11      | 0.07      | 0.06      |           |
|                             | variance                     | <b>0.41</b>  | <b>0.37</b>  | <b>-0.23</b> | <b>-0.23</b> | 0.04         | ~         | 0.03      | 0.08      |           |
| water vapour<br>flux jet    | variance                     | <b>0.29</b>  | <b>0.26</b>  | -0.12        | -0.10        | 0.10         | 0.08      | 0.10      | 0.16      |           |
| East<br>130–135 °E          | front lat                    | anomaly      | <b>-0.42</b> | <b>-0.44</b> | <b>-0.28</b> | <b>-0.32</b> | -0.13     | -0.12     | 0.03      | ~         |
|                             |                              | variance     | <b>0.23</b>  | <b>0.24</b>  | -0.11        | -0.08        | -0.05     | -0.05     | -0.14     | -0.13     |
|                             | water vapour<br>flux jet lat | anomaly      | <b>-0.31</b> | <b>-0.34</b> | <b>-0.22</b> | <b>-0.26</b> | -0.06     | -0.07     | -0.10     | -0.13     |
|                             |                              | anomaly      | 0.08         | ~            | <b>-0.57</b> | <b>-0.54</b> | -0.06     | ~         | -0.02     | ~         |
|                             | water vapour<br>flux jet QU  | variance     | -0.11        | -0.06        | <b>0.54</b>  | <b>0.55</b>  | 0.12      | 0.14      | -0.10     | -0.09     |
|                             |                              | edddvar      | 0.18         | 0.16         | -0.16        | -0.13        | 0.06      | 0.05      | 0.13      | 0.15      |
| water vapour<br>flux jet    | edddvar                      | <b>0.25</b>  | <b>0.22</b>  | <b>-0.20</b> | -0.18        | 0.04         | 0.01      | 0.09      | 0.13      |           |

**Supplementary Table S7.4a.** Combinations of the CCs of rainfall extremes with monsoon indices (regional CC), and the monsoon indices with the score of the ENSO+ mode (hemispheric CC). In each style, the three letters represent the hypothesized combined effect of the ENSO+ mode on rainfall extremes, using hemispheric CCs for 17-year (2006–2022) observations, 53-year (1958–2010) observations, and 53-year (1958–2010) d4PDF. The letters “n” or “N” represent anti-correlated effect, “p” or “P” represent correlated effect, “x” or blank represent no effect. Normal font n/p means both regional and hemispheric CCs were not significant. Bolded **n/p** means significant regional CC only. Normal font N/P means significant hemispheric CC only. Bolded **N/P** means both regional and hemispheric CCs were significant, and cells with these letters are shaded.

| ENSO+      |        | West (125-130°E)          |         |     | East (130-135°E) |     |                |     |
|------------|--------|---------------------------|---------|-----|------------------|-----|----------------|-----|
|            |        | water vapour jet strength |         |     | jet latitude     |     | front latitude |     |
| region     | rain   | QU anom                   | QV anom | var | anom             | var | anom           | var |
| 1<br>KYUS  | hourly | nnx                       | xxN     | NNx | xxP              |     | xxP            | xxn |
|            | daily  | nnx                       | p×N     | NNx | xxP              |     | xxP            | xxn |
| 2<br>KYUW  | hourly | nnx                       | p×N     | NNx | p×P              |     |                | xxn |
|            | daily  | nnx                       | p×N     | NNx | p×x              |     |                | xxn |
| 3<br>KYUN  | hourly | nnx                       | p×N     |     |                  |     |                | xxn |
|            | daily  | nnx                       | p×N     |     |                  |     |                |     |
| 4<br>KYUE  | hourly | nnx                       | p×x     | NNP | p×P              |     |                | xxn |
|            | daily  | nnx                       | p×N     | xxP | p×P              |     |                | xxn |
| 5<br>CHUW  | hourly | nnx                       | p×N     |     | n×x              |     |                | xxn |
|            | daily  | nnx                       | p×N     |     |                  |     |                | xxn |
| 6<br>CHUN  | hourly |                           |         | PPP | xxP              |     | xxP            |     |
|            | daily  |                           | p×N     | PPx |                  |     |                |     |
| 7<br>CHUS  | hourly | nnx                       | p×x     | xxP | xxP              |     | xxP            |     |
|            | daily  | nnx                       | p×N     | PPx | xxP              |     |                |     |
| 8<br>SHIP  | hourly | nnx                       |         |     | xxP              |     |                |     |
|            | daily  | nnx                       | xxN     | xxP | p×P              |     |                | xxn |
| 9<br>KANS  | hourly | nnx                       |         |     | xxP              |     |                | xxn |
|            | daily  | nnx                       | xxN     | NNx | xxP              |     |                |     |
| 10<br>KANN | hourly | nnx                       |         | xxP | xxP              |     | xxP            |     |
|            | daily  | nnx                       | xxN     |     | xxP              |     |                |     |

**Supplementary Table S7.4b.** Combinations of the CCs of rainfall extremes with monsoon indices (regional CC), and the monsoon indices with the score of the ENSO- mode (hemispheric CC). In each style, the three letters represent the hypothesized combined effect of the ENSO- mode on rainfall extremes, using hemispheric CCs for 17-year (2006–2022) observations, 53-year (1958–2010) observations, and 53-year (1958–2010) d4PDF. The letters “n” or “N” represent anti-correlated effect, “p” or “P” represent correlated effect, “x” or blank represent no effect. Normal font n/p means both regional and hemispheric CCs were not significant. Bolded **n/p** means significant regional CC only. Normal font N/P means significant hemispheric CC only. Bolded **N/P** means both regional and hemispheric CCs were significant, and cells with these letters are shaded.

| ENSO-      |        | West (125-130°E)          |            |            | East (130-135°E) |            |                |            |
|------------|--------|---------------------------|------------|------------|------------------|------------|----------------|------------|
|            |        | water vapour jet strength |            |            | jet latitude     |            | front latitude |            |
| region     | rain   | QU<br>anom                | QV<br>anom | var        | anom             | var        | anom           | var        |
| 1<br>KYUS  | hourly | <b>PPP</b>                | <b>xxP</b> | <b>pP×</b> | <b>xxp</b>       | <b>p×P</b> | <b>xpP</b>     | <b>p××</b> |
|            | daily  | <b>PPP</b>                | <b>p×P</b> | <b>pP×</b> | <b>xxp</b>       | <b>p×P</b> | <b>xxP</b>     | <b>p××</b> |
| 2<br>KYUW  | hourly | <b>PPP</b>                | <b>p×P</b> | <b>pP×</b> | <b>n×p</b>       | <b>p×P</b> |                | <b>p××</b> |
|            | daily  | <b>PPP</b>                | <b>p×P</b> | <b>pP×</b> | <b>n××</b>       | <b>p×P</b> |                | <b>p××</b> |
| 3<br>KYUN  | hourly | <b>PPP</b>                | <b>p×P</b> |            |                  | <b>xxP</b> |                | <b>p××</b> |
|            | daily  | <b>PPP</b>                | <b>p×P</b> |            |                  | <b>p×P</b> |                | <b>p××</b> |
| 4<br>KYUE  | hourly | <b>PP×</b>                | <b>p××</b> | <b>pP×</b> | <b>n×p</b>       | <b>p×P</b> |                |            |
|            | daily  | <b>PP×</b>                | <b>p×P</b> |            | <b>n×p</b>       | <b>p×P</b> |                |            |
| 5<br>CHUW  | hourly | <b>PPP</b>                | <b>p×P</b> |            | <b>p××</b>       | <b>p×P</b> |                |            |
|            | daily  | <b>PPP</b>                | <b>p×P</b> |            |                  | <b>p×P</b> | <b>xp×</b>     | <b>p××</b> |
| 6<br>CHUN  | hourly | <b>xxP</b>                |            | <b>nN×</b> | <b>xxp</b>       | <b>xxP</b> | <b>xxP</b>     | <b>p××</b> |
|            | daily  | <b>xxP</b>                | <b>p×P</b> | <b>nN×</b> |                  | <b>p×P</b> |                | <b>p××</b> |
| 7<br>CHUS  | hourly | <b>PPP</b>                | <b>p×P</b> |            | <b>xxp</b>       | <b>p×P</b> | <b>xnP</b>     | <b>p××</b> |
|            | daily  | <b>PPP</b>                | <b>p×P</b> | <b>nN×</b> | <b>xxp</b>       | <b>p×P</b> | <b>xn×</b>     | <b>p××</b> |
| 8<br>SHIP  | hourly | <b>PP×</b>                |            |            | <b>xxp</b>       | <b>xxP</b> |                |            |
|            | daily  | <b>PP×</b>                | <b>xxP</b> |            | <b>n×p</b>       | <b>p×P</b> |                |            |
| 9<br>KANS  | hourly | <b>PP×</b>                |            |            | <b>xxp</b>       | <b>p×P</b> |                |            |
|            | daily  | <b>PP×</b>                | <b>xxP</b> | <b>pP×</b> | <b>xxp</b>       | <b>p×P</b> |                |            |
| 10<br>KANN | hourly | <b>PP×</b>                |            |            | <b>xxp</b>       | <b>p×P</b> | <b>xnP</b>     |            |
|            | daily  | <b>PPP</b>                | <b>xxP</b> |            | <b>xxp</b>       | <b>p×P</b> | <b>xn×</b>     |            |

**Supplementary Table S7.4c.** Combinations of the CCs of rainfall extremes with monsoon indices (regional CC), and the monsoon indices with the score of the Trend+ mode (hemispheric CC). In each style, the three letters represent the hypothesized combined effect of the Trend+ mode on rainfall extremes, using hemispheric CCs for 17-year (2006–2022) observations, 53-year (1958–2010) observations, and 53-year (1958–2010) d4PDF. The letters “n” or “N” represent anti-correlated effect, “p” or “P” represent correlated effect, “x” or blank represent no effect. Normal font n/p means both regional and hemispheric CCs were not significant. Bolded **n/p** means significant regional CC only. Normal font N/P means significant hemispheric CC only. Bolded **N/P** means both regional and hemispheric CCs were significant, and cells with these letters are shaded.

| Trend+     |        | West (125-130°E)          |         |     | East (130-135°E) |     |                |     |
|------------|--------|---------------------------|---------|-----|------------------|-----|----------------|-----|
|            |        | water vapour jet strength |         |     | jet latitude     |     | front latitude |     |
| region     | rain   | QU anom                   | QV anom | var | anom             | var | anom           | var |
| 1<br>KYUS  | hourly | <b>p</b> xx               |         |     |                  |     |                | pnx |
|            | daily  | <b>p</b> xx               |         |     |                  |     |                | pnx |
| 2<br>KYUW  | hourly | <b>p</b> xx               |         |     | <b>p</b> xx      |     |                | pnx |
|            | daily  | <b>p</b> xx               |         |     | pxx              |     |                | pnx |
| 3<br>KYUN  | hourly | pxx                       |         |     |                  |     |                | pnx |
|            | daily  | pxx                       |         |     |                  |     |                | pnx |
| 4<br>KYUE  | hourly | <b>p</b> xx               |         |     | pxx              |     |                |     |
|            | daily  | <b>p</b> xx               |         |     | pxx              |     |                |     |
| 5<br>CHUW  | hourly | <b>p</b> xx               |         |     | nxx              |     |                |     |
|            | daily  | <b>p</b> xx               |         |     |                  |     |                | pnx |
| 6<br>CHUN  | hourly |                           |         |     |                  |     |                | pnx |
|            | daily  |                           |         |     |                  |     |                | pnx |
| 7<br>CHUS  | hourly | <b>p</b> xx               |         |     |                  |     |                | pnx |
|            | daily  | <b>p</b> xx               |         |     |                  |     |                | pnx |
| 8<br>SHIP  | hourly | pxx                       |         |     |                  |     |                |     |
|            | daily  | <b>p</b> xx               |         |     | pxx              |     |                |     |
| 9<br>KANS  | hourly | <b>p</b> xx               |         |     |                  |     |                |     |
|            | daily  | <b>p</b> xx               |         |     |                  |     |                |     |
| 10<br>KANN | hourly | pxx                       |         |     |                  |     |                |     |
|            | daily  | pxx                       |         |     |                  |     |                |     |



**Supplementary Table S7.4d.** Combinations of the CCs of rainfall extremes with monsoon indices (regional CC), and the monsoon indices with the score of the PDV mode (hemispheric CC). In each style, the three letters represent the hypothesized combined effect of the PDV mode on rainfall extremes, using hemispheric CCs for 17-year (2006–2022) observations, 53-year (1958–2010) observations, and 53-year (1958–2010) d4PDF. The letters “n” or “N” represent anti-correlated effect, “p” or “P” represent correlated effect, “x” or blank represent no effect. Normal font n/p means both regional and hemispheric CCs were not significant. Bolded **n/p** means significant regional CC only. Normal font N/P means significant hemispheric CC only. Bolded **N/P** means both regional and hemispheric CCs were significant, and cells with these letters are shaded.

| PDV        |        | West (125-130°E)          |            |     | East (130-135°E) |     |                |     |
|------------|--------|---------------------------|------------|-----|------------------|-----|----------------|-----|
|            |        | water vapour jet strength |            |     | jet latitude     |     | front latitude |     |
| region     | rain   | QU anom                   | QV anom    | var | anom             | var | anom           | var |
| 1<br>KYUS  | hourly |                           |            |     |                  |     |                |     |
|            | daily  |                           | nN×        |     |                  |     |                |     |
| 2<br>KYUW  | hourly |                           | <b>nN×</b> |     | <b>p</b> ××      |     |                |     |
|            | daily  |                           | <b>nN×</b> |     | p××              |     |                |     |
| 3<br>KYUN  | hourly |                           | <b>nN×</b> |     |                  |     |                |     |
|            | daily  |                           | <b>nN×</b> |     |                  |     |                |     |
| 4<br>KYUE  | hourly |                           | nN×        |     | p××              |     |                |     |
|            | daily  |                           | <b>nN×</b> |     | p××              |     |                |     |
| 5<br>CHUW  | hourly |                           | nN×        |     | n××              |     |                |     |
|            | daily  |                           | <b>nN×</b> |     |                  |     |                |     |
| 6<br>CHUN  | hourly |                           |            |     |                  |     |                |     |
|            | daily  |                           | nN×        |     |                  |     |                |     |
| 7<br>CHUS  | hourly |                           | <b>nN×</b> |     |                  |     |                |     |
|            | daily  |                           | <b>nN×</b> |     |                  |     |                |     |
| 8<br>SHIP  | hourly |                           |            |     |                  |     |                |     |
|            | daily  |                           |            |     | p××              |     |                |     |
| 9<br>KANS  | hourly |                           |            |     |                  |     |                |     |
|            | daily  |                           |            |     |                  |     |                |     |
| 10<br>KANN | hourly |                           |            |     |                  |     |                |     |
|            | daily  |                           |            |     |                  |     |                |     |
